# Supplementary material for: Bichromophoric ruthenium(ii) bis-terpyridine-BODIPY based photosensitizers for cellular imaging and photodynamic therapy
Source: Royal Society of Chemistry journal article supplement (doi:10.1039/d2dt01137a), 2022-01-01
Supplement: d2dt01137a1.pdf [file d2dt01137a1.pdf]

## **Electronic supplementary information**

# **Bichromophoric ruthenium(II) bis-terpyridine-BODIPY based photosensitizers for cellular imaging and photodynamic therapy**

*Subhadeep Paul,<sup>†</sup> Sanmoy Pathak,<sup>‡</sup> Somarupa Sahoo,<sup>†</sup> Ram Chandra Maji,<sup>†</sup> Utso Bhattacharyya,<sup>†</sup> Dipankar Nandi<sup>\*,‡</sup> and Akhil R. Chakravarty<sup>\*,†</sup>*

<sup>†</sup>Department of Inorganic and Physical Chemistry and <sup>‡</sup>Department of Biochemistry, Indian Institute of Science, Bangalore 560 012, India

## **Corresponding Authors**

\*D.N.: e-mail, nandi@iisc.ac.in

\*A.R.C.: e-mail, arc@iisc.ac.in

## TABLE OF CONTENTS

### **General information and methods:**

|                                                     |     |
|-----------------------------------------------------|-----|
| Materials                                           | S5  |
| Instrumentation and methods                         | S5  |
| X-ray crystallographic details for L <sup>1</sup>   | S5  |
| Emission quantum yield measurement                  | S6  |
| Theoretical calculations                            | S7  |
| DNA binding studies                                 | S7  |
| Lipophilicity measurement                           | S7  |
| Solution phase stability and photostability studies | S7  |
| Singlet oxygen quantum yield measurement            | S8  |
| DNA photocleavage studies                           | S8  |
| Cell culture conditions                             | S8  |
| Cellular uptake experiments                         | S9  |
| Confocal microscopy                                 | S9  |
| Cytotoxicity and photocytotoxicity                  | S9  |
| Annexin V FITC/ PI assay                            | S10 |
| DCFDA assay                                         | S10 |
| SOSG (singlet oxygen sensor green) assay            | S10 |

### **Schemes:**

|                                                |     |
|------------------------------------------------|-----|
| Scheme 1. Synthesis of ligand L <sup>1</sup> . | S11 |
|------------------------------------------------|-----|

### **Figures:**

|                                                                                                                               |          |
|-------------------------------------------------------------------------------------------------------------------------------|----------|
| Fig. S1, S2 <sup>1</sup> H NMR and <sup>13</sup> C NMR spectra of ligand L <sup>1</sup> in CDCl <sub>3</sub> .                | S11      |
| Fig. S3 Mass spectrum of ligand L <sup>1</sup> in acetonitrile.                                                               | S12      |
| Fig. S4 Absorption and emission spectra of ligands.                                                                           | S12      |
| Fig. S5 Cyclic voltammograms of ligands.                                                                                      | S13      |
| Fig. S6 – S9 <sup>1</sup> H NMR and <sup>13</sup> C NMR spectra of the complexes <b>1</b> , <b>2</b> in DMSO-d <sub>6</sub> . | S13, S14 |
| Fig. S10, S11 Mass spectra of the complexes <b>1</b> , <b>2</b> in methanol.                                                  | S15      |
| Fig. S12 IR spectra of the complexes <b>1</b> , <b>2</b> .                                                                    | S16      |

|                                                                                           |          |
|-------------------------------------------------------------------------------------------|----------|
| Fig. S13 Cyclic voltammograms of the complexes <b>1</b> , <b>2</b> .                      | S16      |
| Fig. S14 Absorption spectra of the complexes in 10 % DMSO- DPBS.                          | S17      |
| Fig. S15 Luminescence lifetime measurement of complexes <b>1</b> , <b>2</b> .             | S17      |
| Fig. S16 Energy-minimized structures of the complexes <b>1</b> , <b>2</b> .               | S18      |
| Fig. S17 Frontier molecular orbitals of the complex <b>1</b> .                            | S19      |
| Fig. S18 Log P values of the complexes.                                                   | S19      |
| Fig. S19 DNA binding constant ( $K_b$ ) determination of the complexes.                   | S20      |
| Fig. S20 Dark stability study of the complexes.                                           | S20      |
| Fig. S21 Photostability study of the complexes.                                           | S21      |
| Fig. S22 Singlet oxygen quantum yield determination for complexes <b>1</b> , <b>2</b> .   | S21      |
| Fig. S23 DNA photocleavage assay.                                                         | S22      |
| Fig. S24, S25 Cellular uptake studies monitored by flow cytometric analysis.              | S22, S23 |
| Fig. S26 – S28 Confocal imaging and co-localization studies in HeLa cells.                | S23, S24 |
| Fig. S29 – S31 Cytotoxicity assay plots.                                                  | S25      |
| Fig. S32 Annexin V- FITC/ propidium iodide assay.                                         | S26      |
| Fig. S33 DCFDA assay using flow cytometry.                                                | S26      |
| Fig. S34 Singlet oxygen sensor green assay using flow cytometry.                          | S27      |
| Fig. S35 Imaging of HeLa MCTs.                                                            | S28      |
| <b>Tables:</b>                                                                            |          |
| Table S1. Photophysical properties of selected molecules                                  | S29      |
| Table S2. Selected crystallographic parameters for crystal structure of L <sup>1</sup>    | S30      |
| Table S3. Selected bond lengths (Å) and angles from crystal structure of L <sup>1</sup>   | S31      |
| Tables S4, S5. Coordinates for energy minimized structures of complex <b>1</b> , <b>2</b> | S31- S42 |
| Table S6. IC <sub>50</sub> values of selected reported compounds                          | S42      |
| <b>References:</b>                                                                        |          |
| References S1–S11                                                                         | S43      |

## Materials:

All reagents and chemicals were purchased from commercial sources and used without further purification.  $\text{RuCl}_3 \cdot x\text{H}_2\text{O}$  (39.0 % Ru content) was procured from Arora Matthey Ltd. (India) and subsequently converted to  $\text{Ru}(\text{DMSO})_4\text{Cl}_2$  following an established procedure.<sup>51</sup> The solvent purification and drying for reactions were performed using established procedures and degassed with nitrogen using freeze pump thaw cycles or by purging with nitrogen (for alcohols) when necessary.<sup>52</sup> Tetrabutylammonium perchlorate (TBAP) was obtained by adding perchloric acid into a saturated solution of tetrabutylammonium bromide in water in a dropwise fashion, following filtration and desiccation in a phosphorous pentoxide desiccator (*caution!* The compound to be used in small quantities). Cell culture media, buffer, staining dyes, and other chemicals used for biological assays were obtained from Sigma Aldrich or Invitrogen. Supercoiled (SC) pUC19 DNA (Plasmid from the University of California) used in DNA cleavage experiments was purchased from Bangalore Genie (India).

## Instrumentation and methods:

The complexes used and other light-sensitive chemicals were handled under low light conditions or using amber colour glassware/ plasticware or wrapped in aluminium foil when necessary. Complexation and other air/moisture sensitive reactions were carried out in Schlenk vessels using a nitrogen atmosphere. All spectroscopic measurements were performed at 25 °C, unless otherwise mentioned.  $^1\text{H}$  and  $^{13}\text{C}$  NMR spectral acquisitions were made using Bruker Ultrashield 400 MHz and Bruker Ascend 500 MHz spectrometers; data analysis was performed using TopSpin 3.6.2 software. Chemical shifts ( $\delta$ ) in NMR are presented in parts per million (ppm) with reference to tetramethylsilane ( $\delta$  0.0). Mass spectral (ESI-MS) measurements were done using Agilent 6538 Ultra-High Definition (UHD) Accurate Mass Q-TOF spectrometer. Mass spectra simulation was performed using the Molecular Weight Calculator software. Elemental analysis was performed using Thermo Scientific Flash 2000 Organic Elemental Analyzer. IR spectroscopic characterization was done using the Perkin Elmer Spectrum BX spectrophotometer. A Control Dynamics (India) conductivity meter was used for Molar conductivity measurements. Electrochemical experiments were carried out using EG&G PAR model 253 VersaStat potentiostat/galvanostat with electrochemical analysis software 270 using a three-electrode setup having a glassy carbon working, platinum wire auxiliary, and a saturated calomel reference electrode (SCE) with 0.1 M TBAP as supporting electrolyte. Absorption and emission spectral measurements were carried out with SHIMADZU UV-2600 UV-Vis spectrophotometer and HORIBA JOBIN YVON FluroMax-4 and HORIBA Duetta Spectrometer, respectively. Luminescence lifetime measurements were performed with Horiba Jobin Yvon Fluorocube-01-NL Fluorescence Lifetime System. Confocal microscopic images were captured using Olympus FV 3000 microscope and analysed using cellSens and ImageJ software. Flow cytometric analysis was done using FACS VERSE (BD Biosciences) and CytoFLEX (Beckman Coulter) instrument, and data analysis was done using FCS Express 5 and CytExpert software.

### X-ray crystallographic details for L<sup>1</sup>:

The compound was crystallized by slow evaporation of a saturated solution in a 1:1 chloroform-hexane mixture. A clear dark orange crystal having a block-shape with dimensions 0.5 × 0.4 × 0.4 mm<sup>3</sup> was mounted on a hair in perfluoroether oil. Data were collected using a Bruker D8 Quest diffractometer. Data were measured using  $\phi$  and  $\omega$  scans using MoK $\alpha$  radiation. The highest resolution obtained was  $\theta = 27.74^\circ$  (0.76 Å). The indexing of diffraction pattern, and the unit cell refinement was executed using SAINT (Bruker, V8.38A, after 2013) on 9781 reflections, 11% of the total reflections. Data reduction, scaling, and absorption corrections were achieved using SAINT (Bruker, V8.38A, after 2013).<sup>S3</sup> The final completeness is 98.7% out to 27.74° in  $\theta$ . Absorption correction was done by multi-scan method using SADABS-2016/2 (Bruker,2016/2).  $wR_2$  (int) was 0.1364 before and 0.0700 after correction. The ratio between minimum to maximum transmission is 0.8354. The absorption coefficient  $\mu$  of this material is 0.440 mm<sup>-1</sup> at this wavelength ( $\lambda = 0.711\text{\AA}$ ), and the minimum and maximum transmissions are 0.623 and 0.746. The structure solution, and the space group *P*-1 (# 2) determination was done by Intrinsic Phasing included in ShelXT (Sheldrick, 2015) structure solution program and refinement was done by Least Squares using ShelXL (version 2017/1, Sheldrick, 2015) using Olex2 suite of programs.<sup>S4</sup> Anisotropic refinement was used for all non-hydrogen atoms. Hydrogen atoms were placed on geometrically calculated positions and riding model refinement was used for them. Positionally disordered chloroform molecule was treated by splitting chlorine atoms into two (part instruction). Crystal data and relevant details are given in Table S1.

The crystal structure of ligand L<sup>1</sup> gave one B-alerts in the cifcheck file. PLAT910\_ALERT\_3\_B Missing # of FCF Reflection(s) Below Theta(Min). The missing reflections falls in the bim-stopper's shadow. This error is related to the diffractometer's limitation.

### Emission quantum yield measurement:

The emission quantum yield of the complexes was measured in DMSO using fluorescein as a reference sample ( $\Phi_f = 0.91$  in 0.01 M NaOH solution). A series of solutions were prepared in DMSO (for complexes) or 0.01 M NaOH (for fluorescein), having an absorbance value less than 0.1. The samples were excited at 470 nm, and emission spectra were recorded between 480 nm to 700 nm. Linear fits were obtained from plots of integrated emission intensity vs. absorbance plot for each sample. The quantum yield value was calculated from the following equation.

$$\Phi_X = \Phi_{ST} \times (\text{Grad}_X/\text{Grad}_{ST}) \times (\eta_X^2/\eta_{ST}^2)$$

Grad represents gradient values obtained from linear plots, and ST and X represent standard and test samples, respectively. Grad stands for gradient values obtained from integrated emission intensity vs. absorbance plot,  $\eta$  represents the refractive index of the solvent used for the samples,  $\Phi$  represents fluorescence quantum yield values.

### **Theoretical calculations:**

All DFT (density functional theory) studies were done with the Gaussian 16 package. Geometry optimization and vibrational frequency calculations were done with lanl2dz (Los Alamos National Laboratory 2 Double-Zeta) basis set for all atoms using the M06 level of theory. The solvation effect of DMSO was included in the calculation using the integral equation formalism polarization continuum model (IEFPCM). TD-DFT (time-dependent density functional theory) calculations were carried out to obtain the electronic transition state energies and the intensities of the first 100 lowest energy states. Again, the calculation was performed using the lanl2dz basis set, M06 level of theory, and the solvation of DMSO utilizing the IEF-PCM model. The orbitals were analysed and plotted using the Chemcraft program.

### **DNA binding studies:**

DNA binding experiments were performed in 5 mM Tris- HCl/NaCl buffer (pH 7.2) using DMF solution of the complexes (overall DMF concentration is 5% v/v). Calf thymus (ct) DNA solution was prepared by dissolving ct-DNA in 5 mM Tris-HCl/NaCl buffer, and the concentration of DNA was measured from absorbance at 260 nm with the known molar absorptivity  $6600 \text{ M}^{-1} \text{ cm}^{-1}$ . The absorbance ratio value at 260 nm and 280 nm was approximately 1.9: 1, suggesting the DNA is free from protein. Absorption titrations were done by varying DNA concentration but keeping the complex concentration constant. Due corrections were made for changes in DNA concentration during titrations. A 5 min equilibration time was given after the addition of DNA and before UV data acquisition. The binding constant was obtained from the following equation.<sup>S5</sup>

$$[\text{DNA}] / (\epsilon_a - \epsilon_f) = [\text{DNA}] / (\epsilon_b - \epsilon_f) + 1 / K_b(\epsilon_b - \epsilon_f)$$

In the equation,  $\epsilon_f$  represents the molar extinction coefficient of the metal complex,  $\epsilon_a$  is the molar extinction coefficient of the complex at a particular DNA concentration,  $\epsilon_b$  is the molar absorption coefficient of the complex fully bound to DNA, [DNA] is the concentration of ct-DNA.

### **Lipophilicity measurement:<sup>S6</sup>**

Lipophilicity measurement of the complexes was done using a modified shake flask method. Saturated solutions of octanol with water and vice versa were prepared by shaking a mixture of water and octanol for 24 h at room temperature. The 20  $\mu\text{M}$  solutions of the complexes were prepared in 2 ml water-saturated octanol, and an equal volume of octanol saturated water was added to it. The mixture was shaken at 250 rpm for 6 h, centrifuged, and then separated. Concentrations of the complexes in both octanol and aqueous layer were measured by absorption spectroscopy.

### **Solution phase stability and photostability studies:**

Stability study of the complexes and rose Bengal was monitored by absorption spectroscopy in phenol red-free cell culture media (DMEM) containing 10% Fetal bovine serum (FBS). For checking the dark stability of the complexes, 10  $\mu\text{M}$  solutions were kept at 37 °C, and

absorption spectra were recorded every 24 h interval up to 72 h. For the photostability study, 2 ml solution containing 10  $\mu$ M photosensitizer was taken in a quartz cuvette and was irradiated from a 400-700 nm light source (2.4 mW/cm<sup>2</sup>). Spectral measurements were carried out at specific intervals for 30 min light exposure with a UV-Vis spectrometer.

#### **Singlet oxygen quantum yield measurement:**

Photo-oxidation titration of 1,3-diphenylisobenzofuran (DPBF) was carried out to determine the singlet oxygen quantum yield in DMSO using rose Bengal as a standard. DMSO (3 ml) containing  $\sim$ 50  $\mu$ M DPBF and respective sample was added in a quartz cuvette, followed by a photosensitizer. The solution was kept in the dark for 20 min for any possible reaction that can take place in dark. The cuvette was then irradiated with 400-700 nm visible light source (2.4 mW/cm<sup>2</sup>) at 5 sec interval and the absorption spectra were recorded. The difference of initial absorbance and the absorbance value at 417 nm at a given irradiation time ( $\Delta$ O.D.) is plotted as a function of irradiation time to obtain a linear fit. The singlet oxygen quantum yield value was calculated from the following equation.

$$\Phi_{\text{sample}} = \Phi_{\text{ST}} \times (\text{Slope}_{\text{sample}} / \text{Slope}_{\text{ST}}) \times (F_{\text{ST}} / F_{\text{sample}})$$

Where ST stands for standard,  $\Phi$  denotes singlet oxygen quantum yield.  $F = 1 - 10^{-\text{OD}}$ .

#### **DNA photocleavage studies:**

The photoinduced DNA cleavage of supercoiled (SC) pUC19 DNA by complex **2** was studied by agarose gel (0.8 %) electrophoresis in 10% DMF-Tris HCl buffer (pH 7.2). Photoirradiation of the samples was done using 532 nm monochromatic laser source (power 100 mW, beam diameter  $0.32 \pm 0.02$  mm, single-mode, model no. EXLSR-532-100-CDRH of Newport Corporation make, Spectra-Physics Laser Division, Santa Clara, C.A, U.S.A.) for 30 min. A total volume of 20 ml solution containing 1  $\mu$ l DNA (33  $\mu$ M), 50 mM sodium chloride, the complex solution with desired concentration, and quencher solution (if used) was incubated for 1 h at 37  $^{\circ}$ C followed by light irradiation or kept in the dark as per requirement. The loading dye (0.25% bromophenol blue, 0.25% xylene cyanol, 30% glycerol, 3  $\mu$ L) was added to the samples and then loaded on 0.75 % agarose gel having 1.0  $\mu$ g/ml ethidium bromide. Gel electrophoresis was carried out in a dark chamber for 2 h at 65 V in TAE (Tris-acetate- EDTA) buffer (pH  $\sim$  8.5). The bands were visualized, and the band intensities were analysed using a UVITEC gel documentation system. Due corrections were made for the small amount of nicked circular (NC) DNA present in the original SC DNA sample and for the difference in binding affinity of EB towards different forms of DNA. For mechanistic studies to determine the nature of ROS, different quenchers and scavengers were added before photolysis. Sodium azide (10.0 mM) for singlet oxygen, potassium iodide (10.0 mM) for hydroxyl radical, catalase (4 unit) for hydrogen peroxide, tiron (10.0 mM) for superoxide was used as quenchers. A set of experiments was done by replacing Tris-HCl buffer with D<sub>2</sub>O. Oxygen dependency on the photocleavage was monitored by applying three freeze pump thaw cycles using argon then subjected to photoirradiation. The error range observed for the determination of % NC from the experiments was 3 to 6 %.



## **Cellular assays**

### **Cell culture conditions:**

Adherent human cervical cancer (HeLa) and noncancerous human embryonic kidney (HEK-293) cells were cultured in Dulbecco's Modified Eagle Medium, and for human lung carcinoma (H1299) cell culture Roswell Park Memorial Institute (RPMI) 1640 were used. The cells were maintained at 37 °C under 5% CO<sub>2</sub> in the cell culture media supplemented with 10% Fetal bovine serum (FBS) and 1% Penicillin-Streptomycin and were passaged 2-3 times a week according to standard aseptic procedures. Cell cultures were started in 25 cm<sup>2</sup> flasks at 10<sup>5</sup> cells ml<sup>-1</sup> and were sub-cultured when growth reached 80% confluency by discarding the old culture medium and washing the cells once with Dulbecco's phosphate-buffered saline (DPBS), followed by a detachment of the cell monolayer with trypsin-EDTA solution (0.25% w/v Trypsin/0.53 mM EDTA). The cell suspension was diluted with culture media and transferred into new culture vessels.

### **Cellular uptake experiments:**

Exponentially growing HeLa cells were plated in a 12 well plate at a seeding density of 10<sup>5</sup> cells per well in DMEM and incubated at 37°C, 5% CO<sub>2</sub> 24 h in an incubator for cell attachment. The cells were then treated with 5 μM of complex **1** and incubated for varying times (2 h, 4 h, 6 h, and 16 h). The cells were then rinsed, lifted with trypsin, and suspended in DPBS. Flow cytometric analysis was performed using a FACS VERSE (BD Biosciences) with 488 nm excitation, and emission was recorded using a FITC channel (500-550 nm).

For checking cellular uptake in different cell lines, HeLa and HEK293 cells were incubated with 10 mM complex **1** and incubated for 2 h followed by flow cytometric analysis.

### **Confocal microscopy:**

Approximately 3 × 10<sup>5</sup> number of HeLa cells were plated in sterile glass-bottom Petri dishes and allowed to adhere for 24 h in an incubator under usual aseptic conditions. The 2 ml prewarmed metal complex solutions (2 μM for complex **1** and 15 μM for complex **2**) prepared in sterile DMEM were added to the sample dishes and incubated at 37°C for 4 h. Then the cells were thoroughly washed with DPBS and incubated with MitoTracker™ Deep Red FM (stains mitochondria) or LysoTracker™ Deep Red (stains lysosome) to stain the respective organelle following the supplier's instructions. The cells were then washed with PBS and incubated with Hoechst to stain the nucleus. Finally, the cells were imaged using a confocal microscope using a 60X oil objective lens. Images were collected and analysed using cellSens software.

### **Cytotoxicity and photocytotoxicity:**

Cell viability assays were performed in triplicates in flat bottom TC-treated polystyrene 96 well plates. An appropriate number of cells with at least 95% viability was transferred in 100

ml aliquots to the wells and placed in a 37°C, 5% CO<sub>2</sub> incubator and allowed to attach for 24 h to obtain approximately 10000 cells per well at the time of drug treatment. The media was refurbished with 100 µl fresh media, and Serial dilutions of metal complexes prepared in cell culture media were added in 100 µL volumes to the respective microplate wells having cells. Two sets of control wells without drug treatment were included in each microplate with either cells only or no cells. All microplates were incubated in the dark for 6 h in the incubator, and then cell culture media was replaced with DPBS. Microplates used for dark cytotoxicity determination were kept in the dark. The plates used for photocytotoxicity determination were exposed to visible light for 30 min (400-700 nm, 5 J cm<sup>-2</sup>) using a Luzchem Photoreactor (Model LZC-1, Ontario, Canada). The buffer was then replaced with media, and all plates were returned to the incubator for a further 18 h. Cell viability was obtained using an MTT dye assay following an established procedure. Briefly, 25 µl of MTT solution (4 mg/ml) was added to each well and incubated for 3 h. The media was then discarded and 150 µl DMSO was added to each well, and absorbance was recorded with a TECAN microplate reader at 570 nm. The concentrations of the compounds where cell viability was reduced by 50% (IC<sub>50</sub> values) for cytotoxicity were obtained from sigmoidal fits of the dose-response curves using GraphPad Prism. IC<sub>50</sub> values of selected reported compounds are compared in a tabular form.<sup>S7-S11</sup>

#### **Annexin V FITC/ propidium iodide assay:**

Approximately 10<sup>5</sup> cells were plated in 6 well plates and incubated for 24 h before complex treatment. Cells were then incubated with complex **2** with different concentrations (50 nM, 100 nM, 200 nM and 500 nM) for 4 h, and then a set of cells was exposed to light (400-700 nm, 2.4 mW/cm<sup>2</sup>, 15 min) and another set was kept in the dark. The cells were then incubated further for another 1 h and processed for flow cytometric analysis. Annexin V- FITC/ propidium iodide staining was performed following supplier's guidelines (BioLegend) and analysed by flow cytometry.

#### **DCFDA assay:**

Human cervical cancer cells, HeLa (seeding density ~ 3 × 10<sup>5</sup> cells), were plated in 6-well plates and allowed to attach for 24 h. Cells were treated with 2 µM complexes (in 0.05% DMSO-DMEM) for 4 h in the dark. Cells were then trypsinized, processed, and stained with 5 µM DCFDA for 15 min at room temperature in the dark. Unstained and stained cells treated only with 0.05% DMSO were kept as control. A set of samples were exposed to light irradiation (400-700 nm, 2.4 mW/cm<sup>2</sup>, 5 min). Flow cytometric analysis was performed using a 488 nm excitation, and fluorescence was collected between 500-550 nm.

#### **SOSG (singlet oxygen sensor green) assay:**

The experiment was performed following a similar protocol as DCFDA. SOSG staining was done following the supplier's guidelines (Invitrogen).

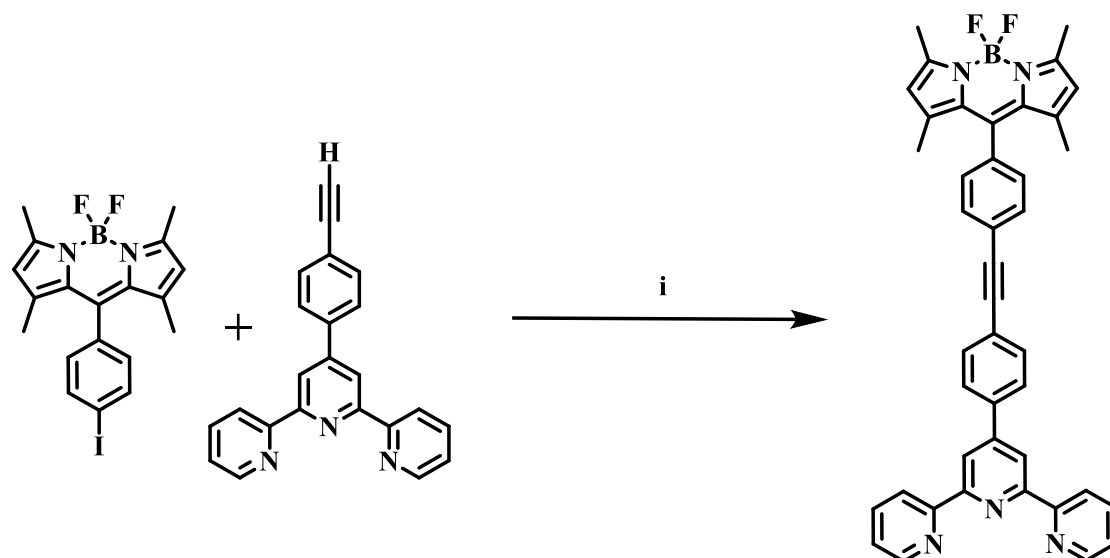

**Scheme S1:** Synthesis of ligand **L<sup>1</sup>**. (i) 0.18 equiv.  $[\text{Pd}(\text{PPh}_3)_2\text{Cl}_2]$ , 0.18 equiv.  $\text{CuI}$ , 0.18 equiv.  $\text{PPh}_3$ , THF-triethylamine mixture, 60° C for 48 h.

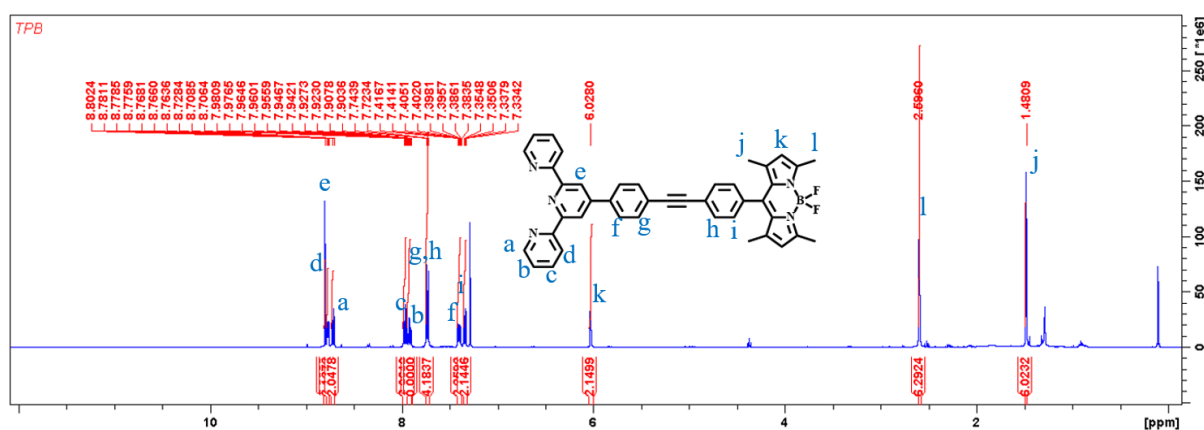

**Fig. S1**  $^1\text{H}$  NMR spectrum of ligand **L<sup>1</sup>** in  $\text{CDCl}_3$ . Inset shows ligand ISIS drawing

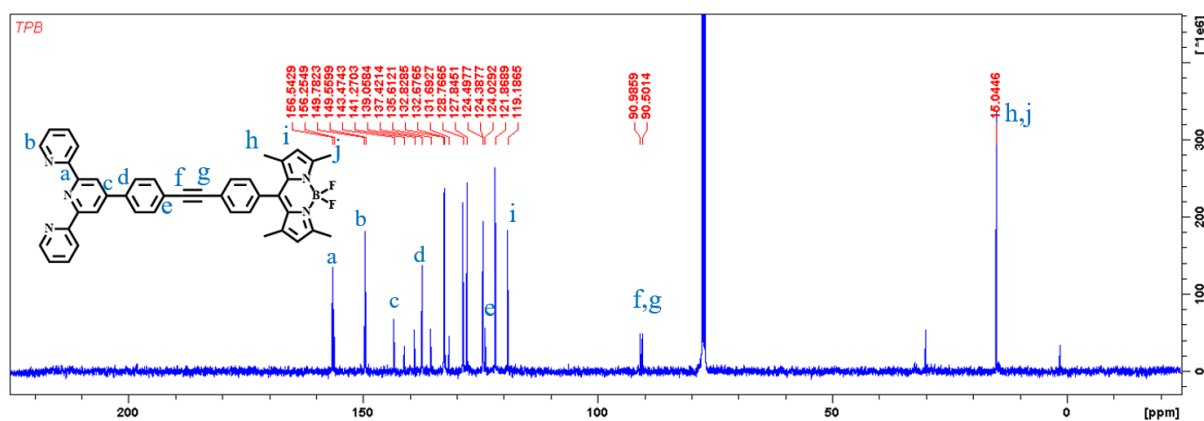

**Fig. S2**  $^{13}\text{C}$  NMR spectrum of ligand **L<sup>1</sup>** in  $\text{CDCl}_3$ . Inset displays ligand ISIS drawing

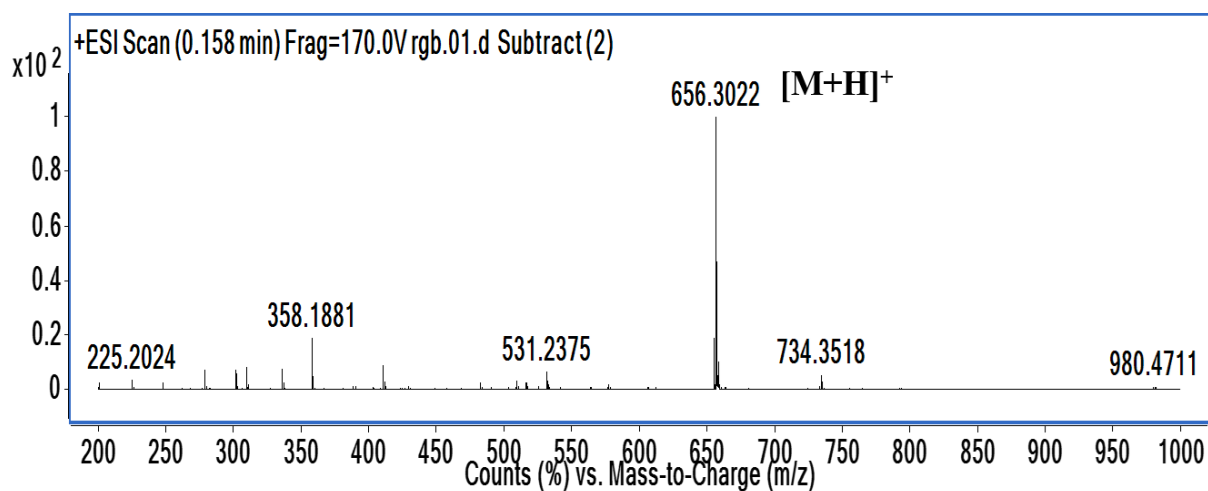

**Fig. S3** Mass spectrum of  $L^1$  in acetonitrile with peak corresponding to  $[M+H]^+$  (m/z) at 656.3022.

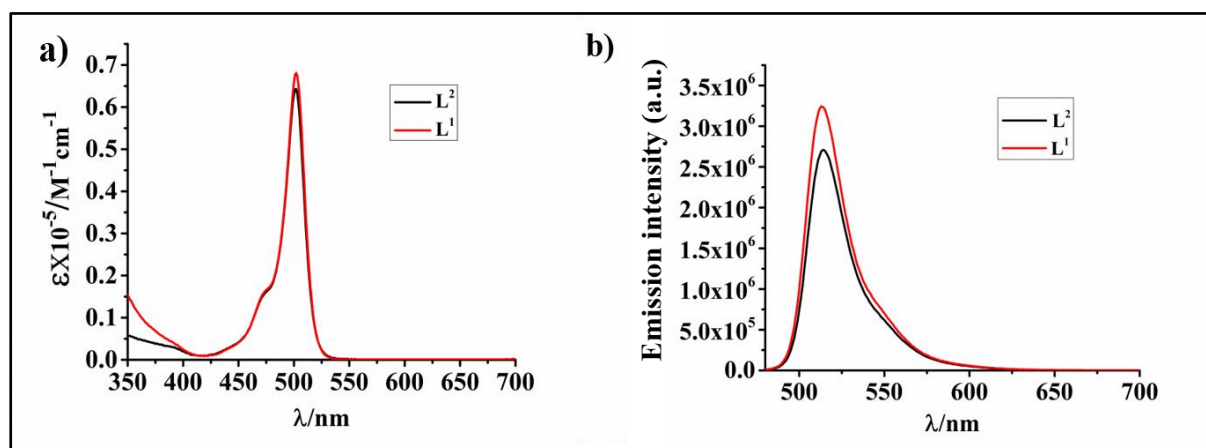

**Fig. S4** a) absorption and b) emission spectra ( $\lambda_{\text{ex}} = 470 \text{ nm}$ ) of ligands  $L^1$  and  $L^2$  in dichloromethane.

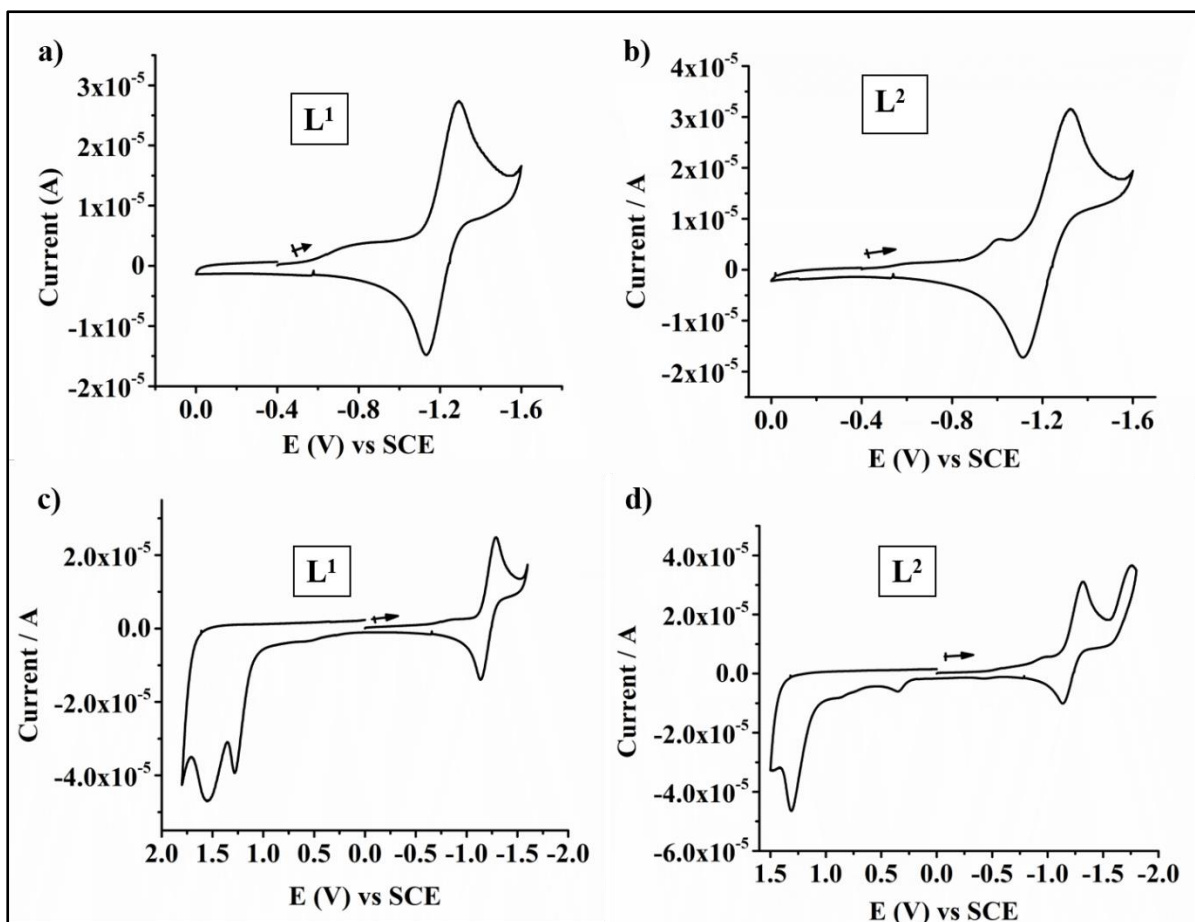

**Fig. S5** Cyclic voltammograms of the ligands: a) and c) for Ligand L<sup>1</sup>, b) and d) for Ligand L<sup>2</sup>, in 0.1M TBAP-dichloromethane using 2.0 mmol ligand concentration at a scan rate of 100 mV sec<sup>-1</sup>.

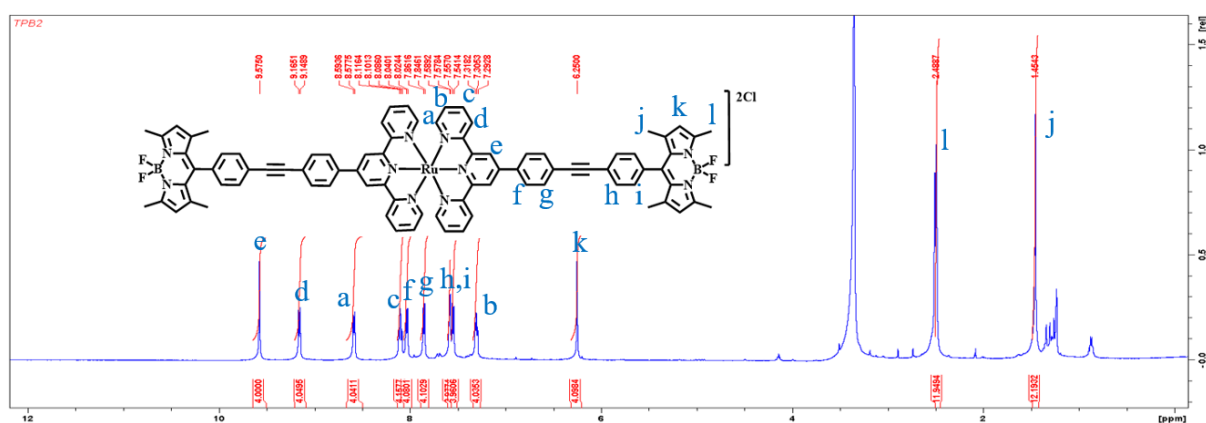

**Fig. S6** <sup>1</sup>H NMR spectrum of complex **1** in DMSO-d<sub>6</sub>. Inset shows the molecule with proton labeling scheme.

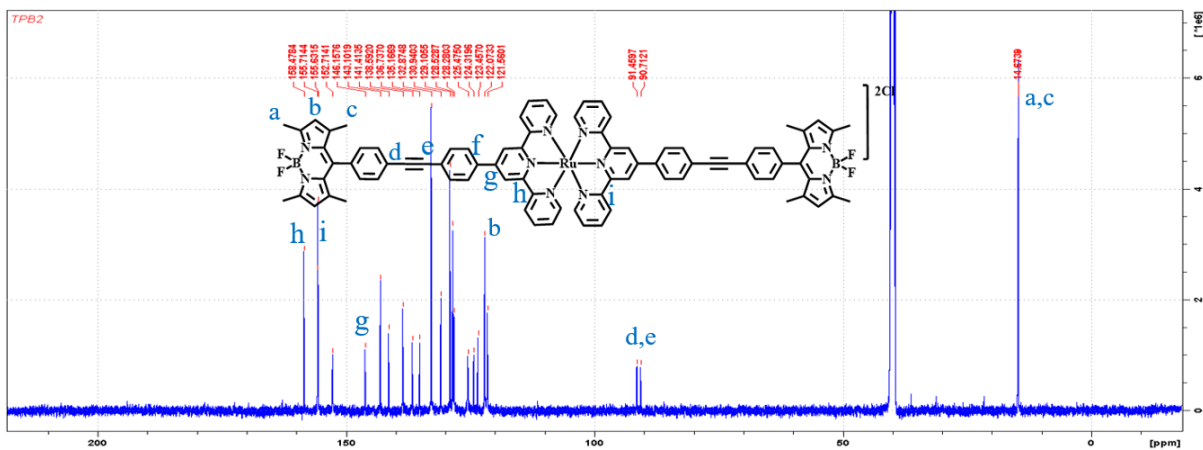

Fig. S7  $^{13}\text{C}$  NMR spectrum of complex **1** in DMSO- $d_6$  with labeling scheme.

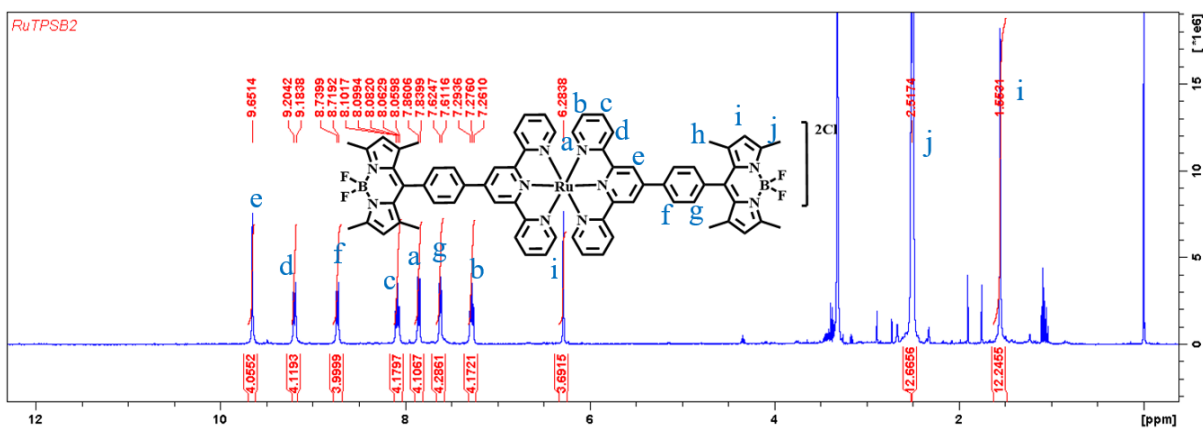

Fig. S8  $^1\text{H}$  NMR spectrum of complex **2** in DMSO- $d_6$  with proton labeling scheme.

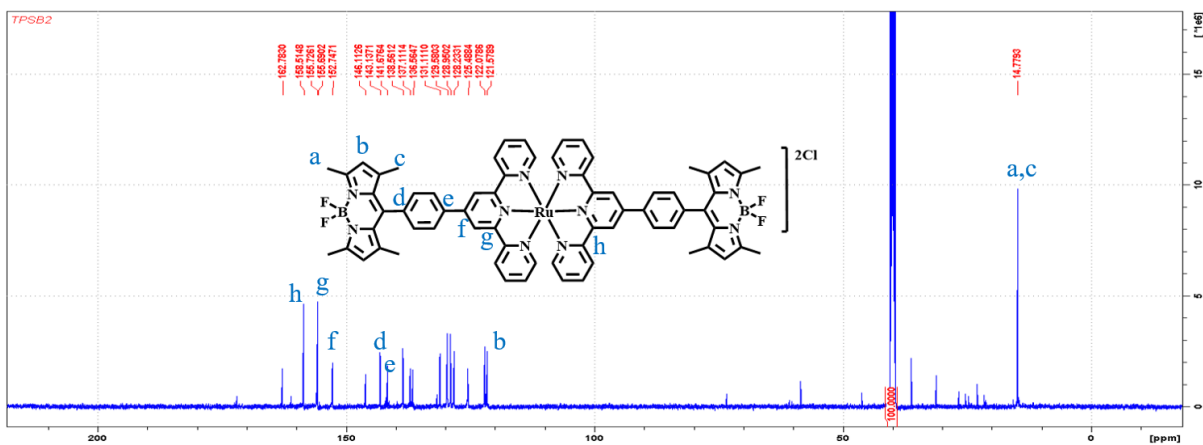

Fig. S9  $^{13}\text{C}$  NMR spectrum of complex **2** in DMSO- $d_6$  with labeling scheme.

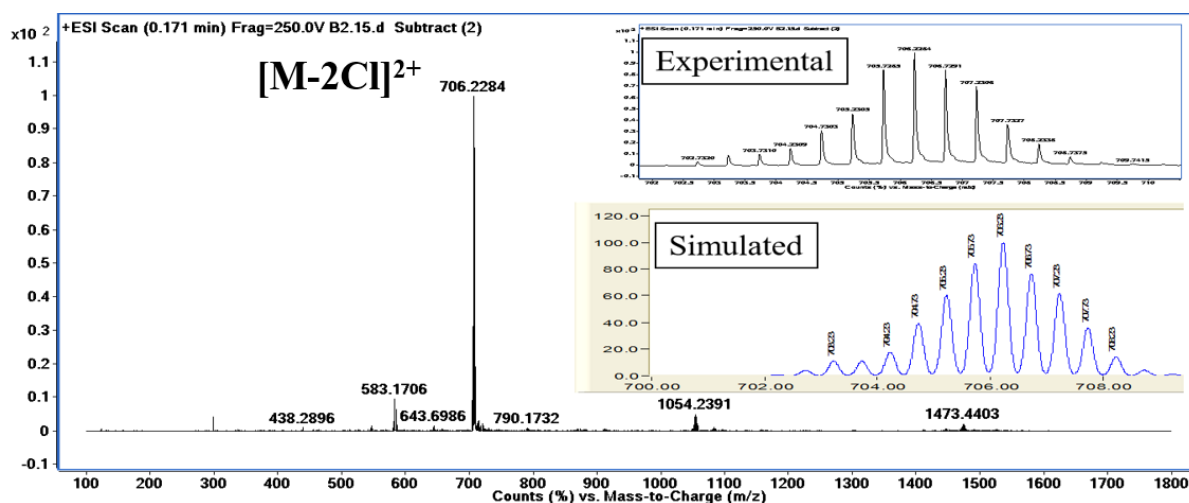

**Fig. S10** Mass spectrum of complex **1** recorded in methanol with peak corresponding to  $[M-2Cl]^{2+}$  (m/z) at 706.2284. The insets show simulated and experimental isotopic distribution.

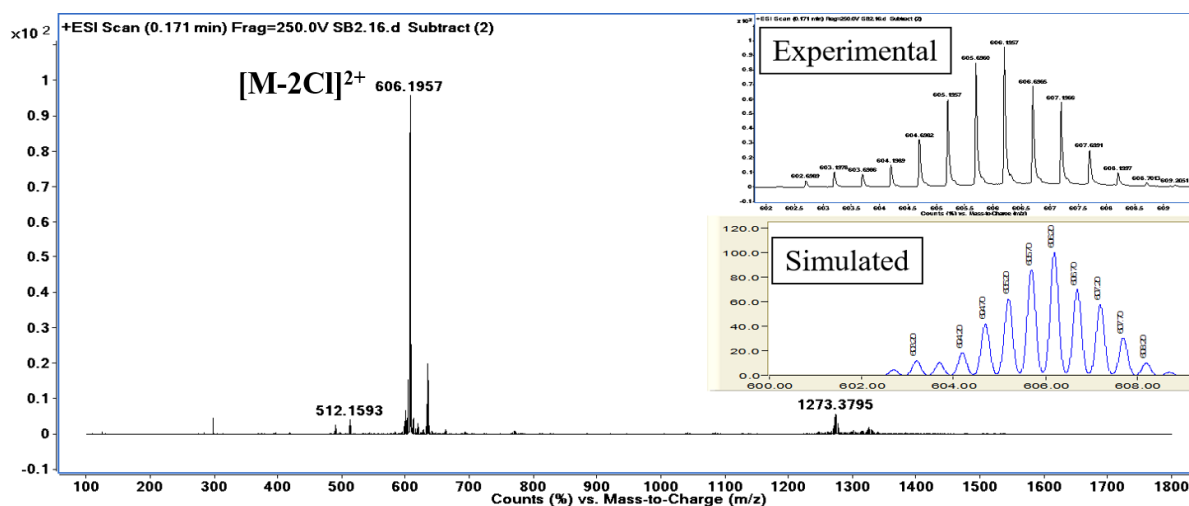

**Fig. S11** Mass spectrum of complex **2** recorded in methanol with peak corresponding to  $[M-2Cl]^{2+}$  (m/z) at 606.1957. The insets show simulated and experimental isotopic distribution.

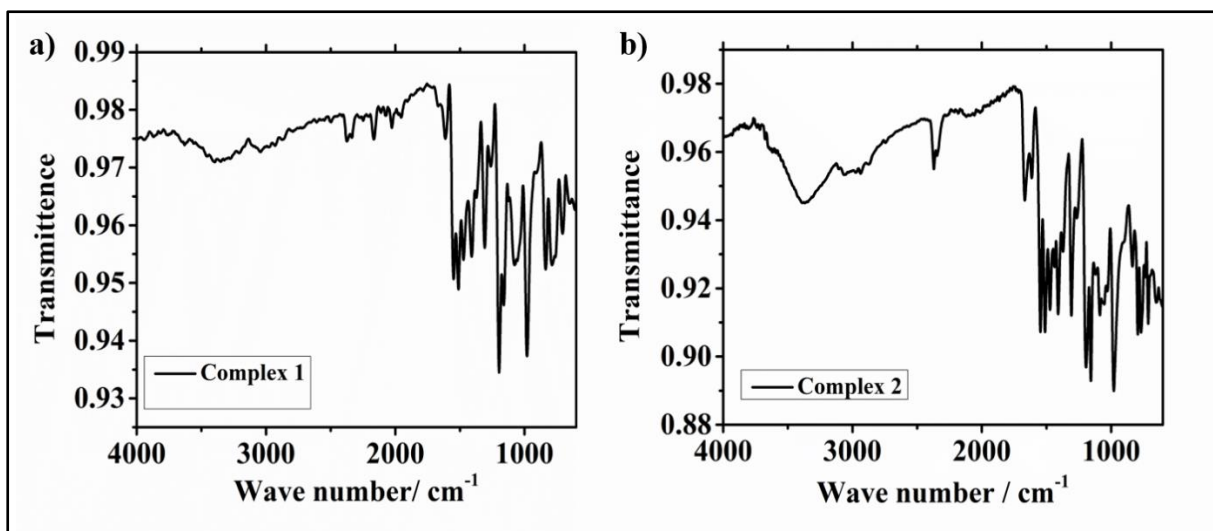

**Fig. S12** Solid state IR spectra of the complexes: a) complex 1 and b) complex 2.

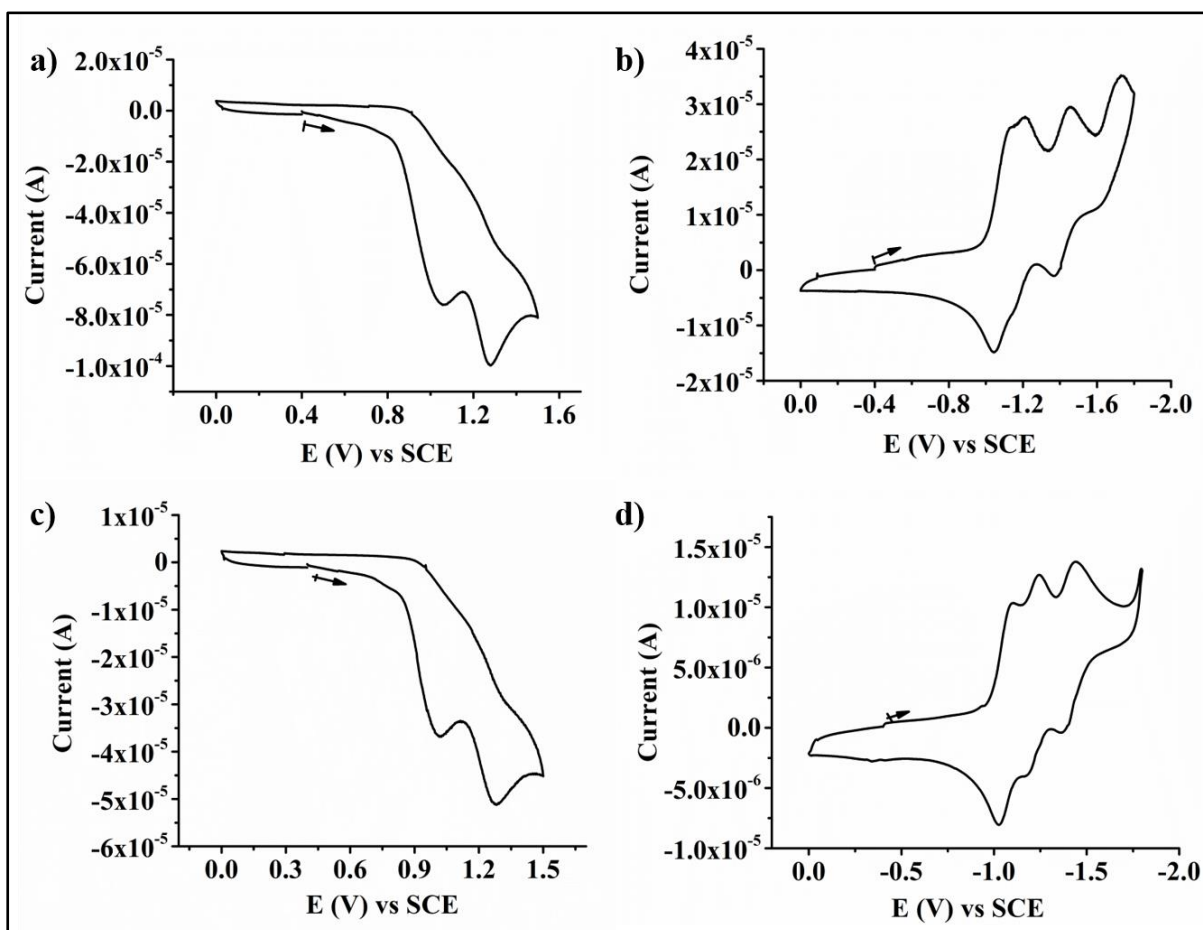

**Fig. S13** Cyclic voltammograms of the complexes: a) and b) for complex 1, c) and d) for complex 2, in 0.1M TBAP-DMF using 2.0 mmol complex concentration at a scan rate of 100 mV sec<sup>-1</sup>.



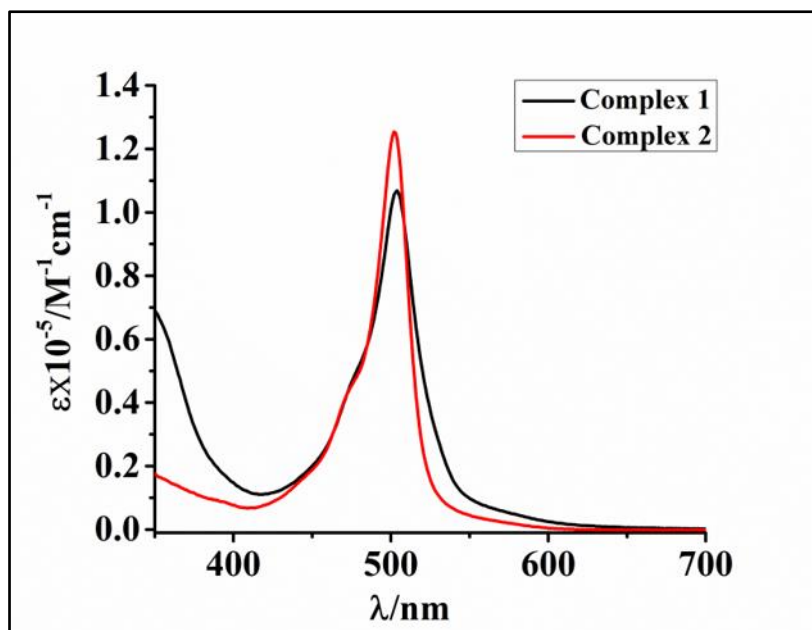

Fig. S14 Absorption spectra of the complexes in 10% DMSO-DPBS.

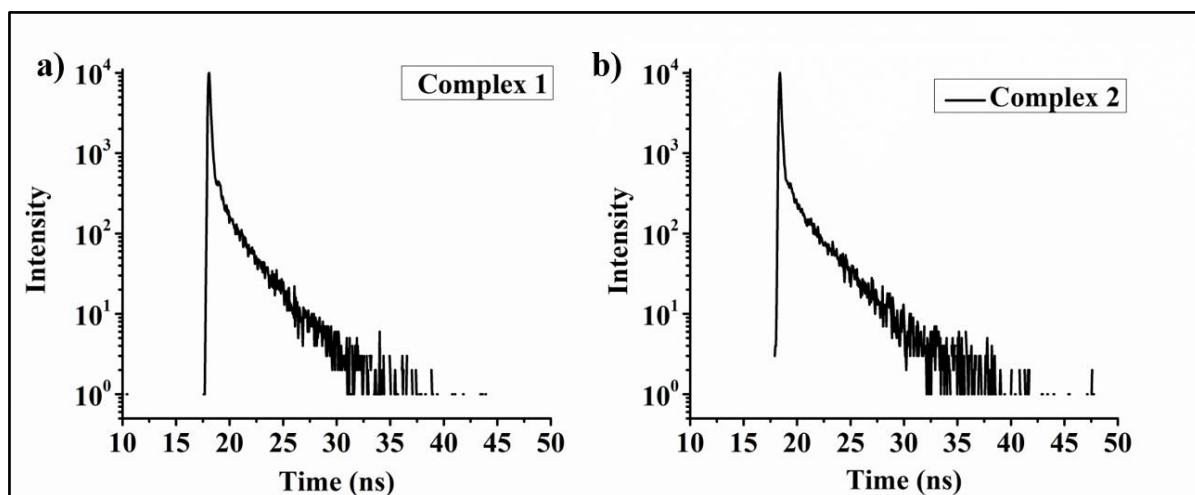

Fig. S15 Fluorescence decay curves of (a) complex 1 and (b) complex 2 in acetonitrile.

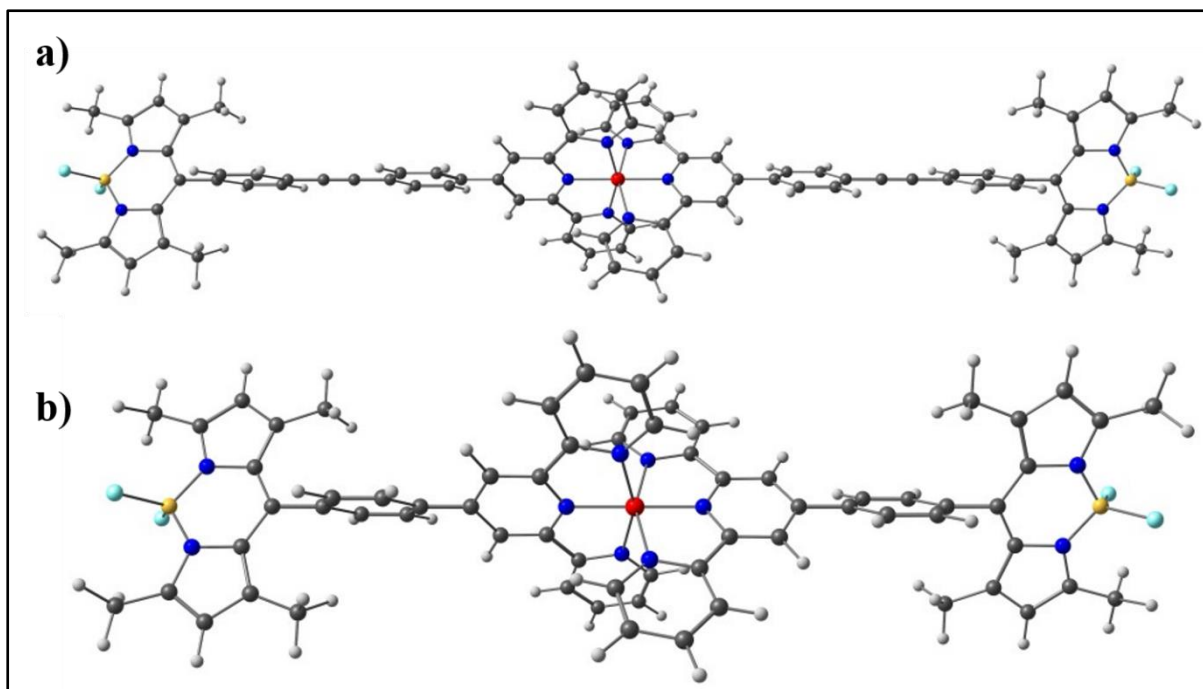

**Fig. S16** Energy minimized structures of the complexes: a) complex **1** and b) complex **2**. Colour codes: Red – Ruthenium; Blue – Nitrogen; Dark grey – Carbon; Pale grey – Hydrogen; Dark yellow – Boron; Sky blue – Fluorine.

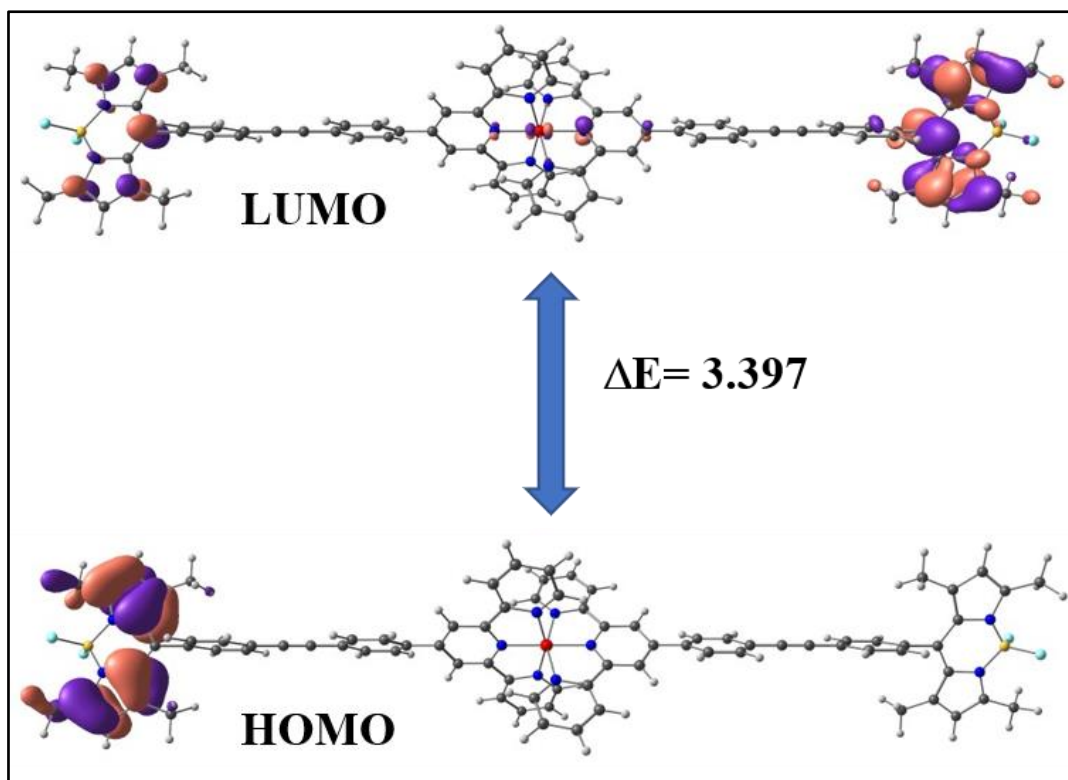

**Fig. S17** Frontier molecular orbitals of complex **1**. Contour value 0.03. Colour codes: Red – Ruthenium; Blue – Nitrogen; Dark grey – Carbon; Pale grey – Hydrogen; Dark yellow – Boron; Sky blue – Fluorine.

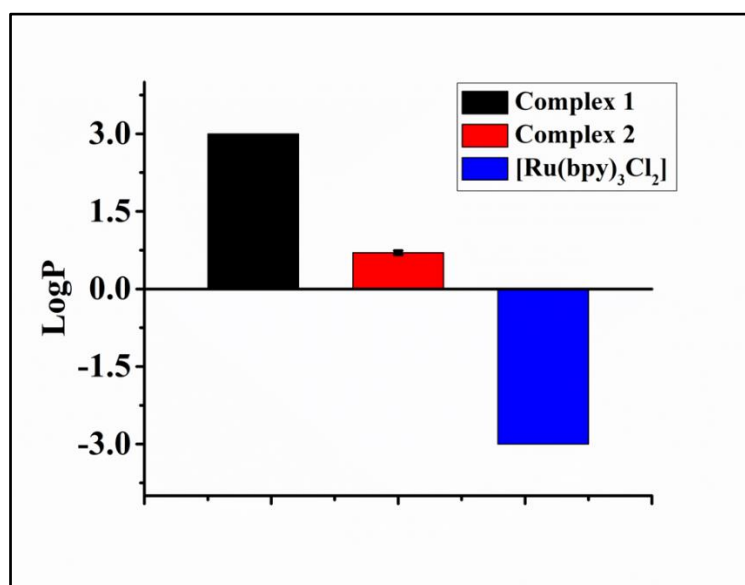

**Fig. S18** Octanol–water partition coefficients of complexes **1**, **2** and [Ru(bpy)<sub>3</sub>]Cl<sub>2</sub>. The data for the bpy complex are taken from reference 6.

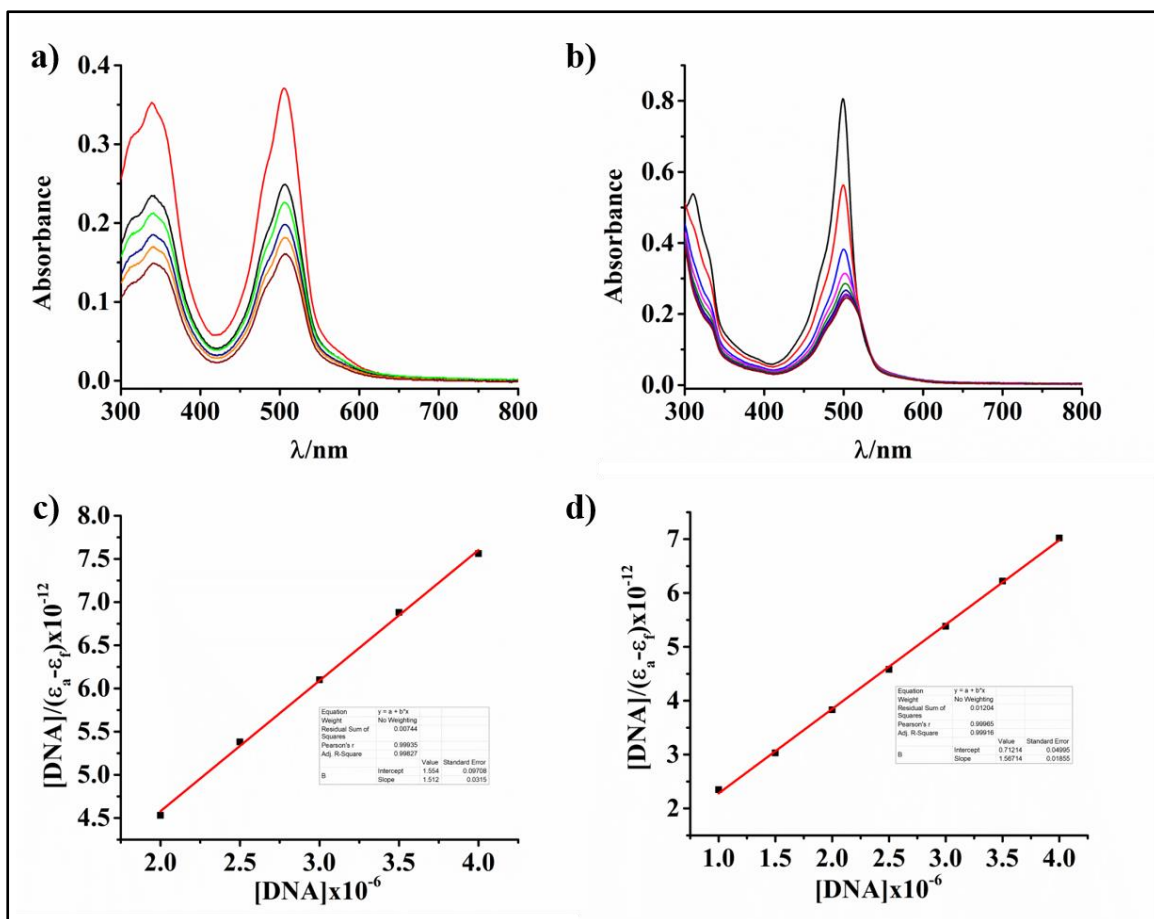

**Fig. S19** DNA binding constant ( $K_b$ ) measurement for the complexes using UV- visible spectroscopy and the corresponding  $[DNA]/(\epsilon_a - \epsilon_f)$  vs.  $[DNA]$  plots. Panels a) and c) are for complex 1, and panels b) and d) are for complex 2.

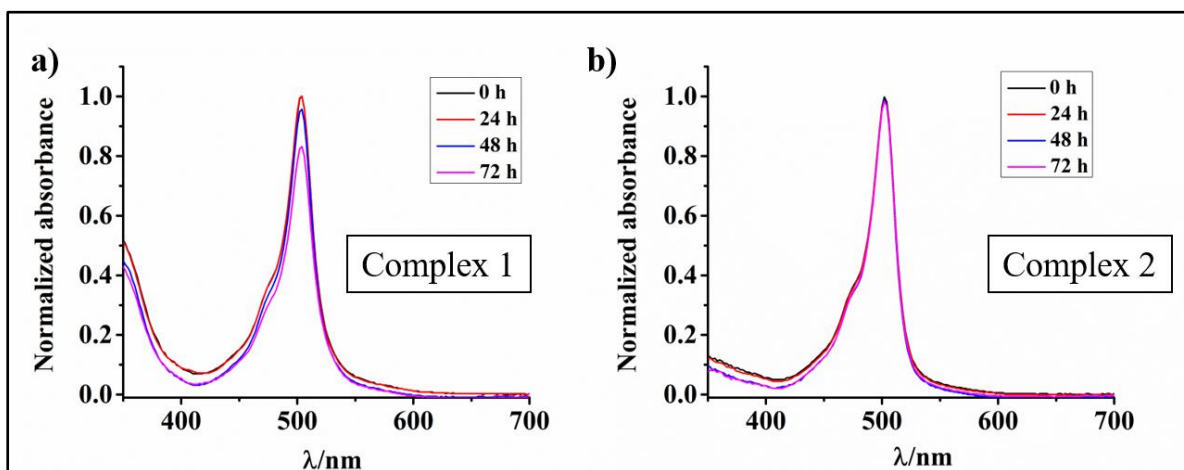

**Fig. S20** Change in the absorption spectral traces with time for the complexes: a) complex 1 and b) complex 2 in 1:9 (V/V) DMSO-DMEM (phenol red-free with 10% FBS). The experiments were carried out at 37 °C over a period of 72 h and the spectra were recorded at certain intervals as mentioned in the figure insets.

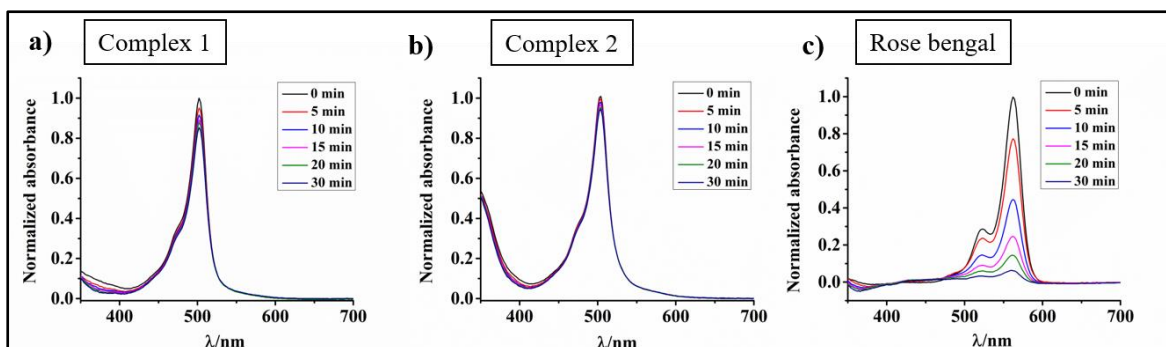

**Fig. S21** Photostability studies: a) complex 1, b) complex 2 and c) rose Bengal in 1:9 (V/V) DMSO-DMEM (phenol red-free with 10% FBS) (400-700 nm, 2.4 mW/cm<sup>2</sup> light source was used for irradiation).

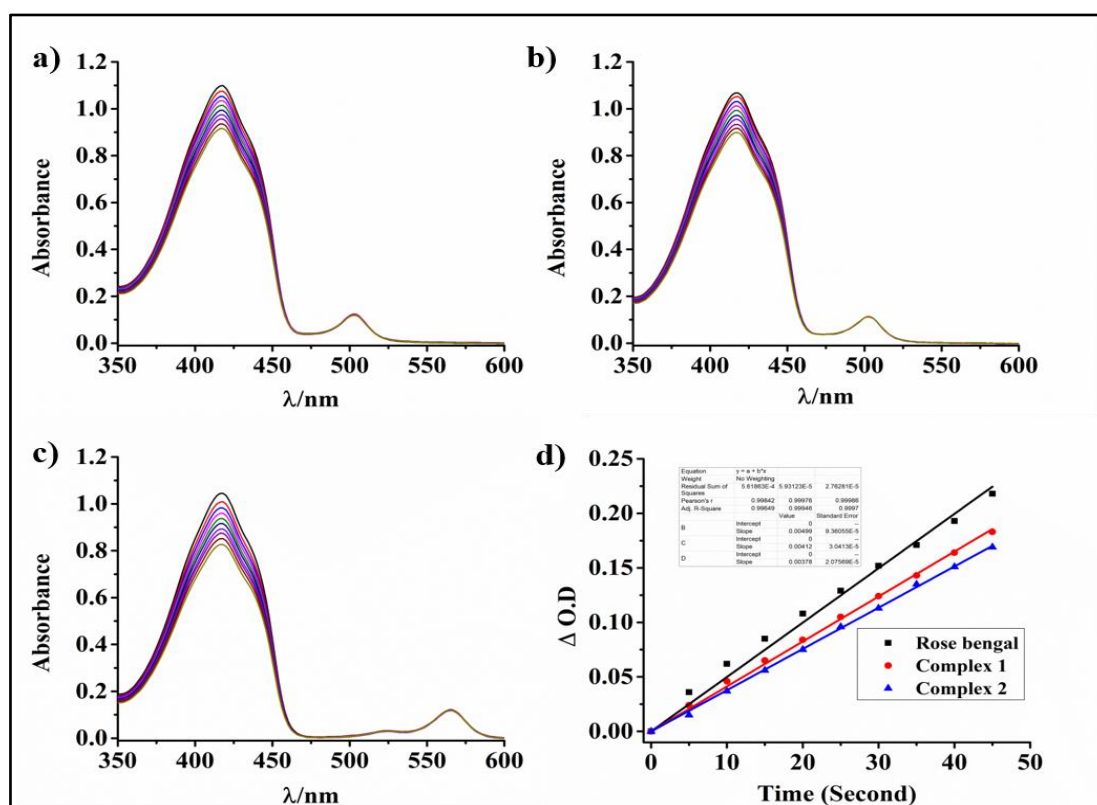

**Fig. S22** Changes in the absorption spectra of DPBF containing complexes on light irradiation: a) complex 1, b) complex 2 and c) rose Bengal. A 400-700 nm light source (2.4 mW/cm<sup>2</sup>) was used for irradiation. d) Linear fits of  $\Delta$ O.D. vs. irradiation time for determination of singlet oxygen quantum yield.

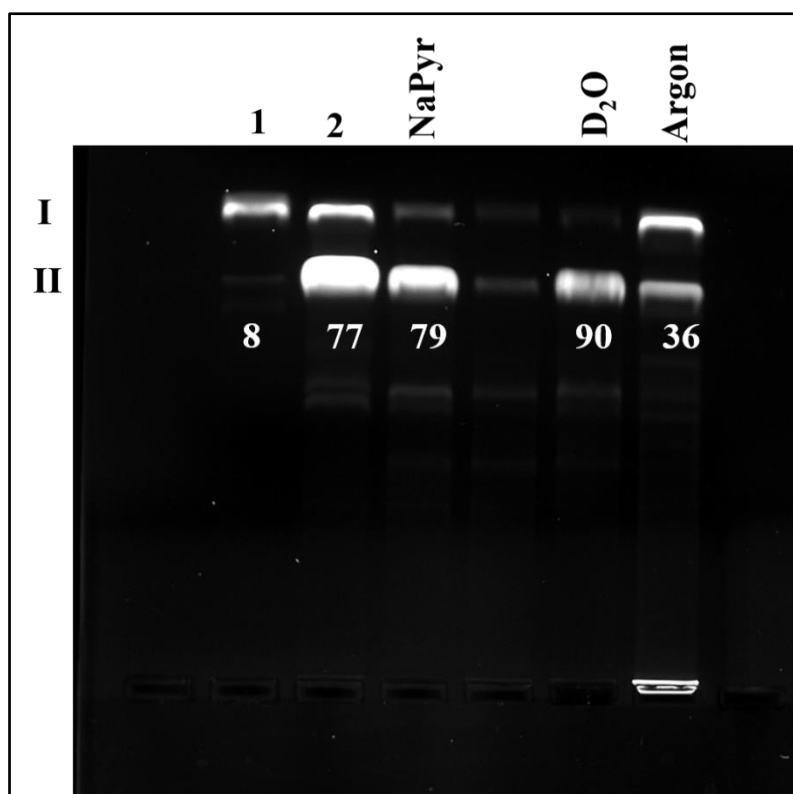

**Fig. S23** Photoinduced cleavage of pUC19 DNA by complex **2** in presence and absence of quenchers or special conditions applied. Lane 1, DNA; Lane 2, DNA treated with complex **2** and exposed to light irradiation. Other lanes contain DNA with complex **2** exposed to irradiation with additives or special conditions as mentioned (form-I is supercoiled DNA and form-II is nicked circular DNA, the percent of nicked circular DNA is mentioned on the lanes, NaPyr = sodium pyruvate).

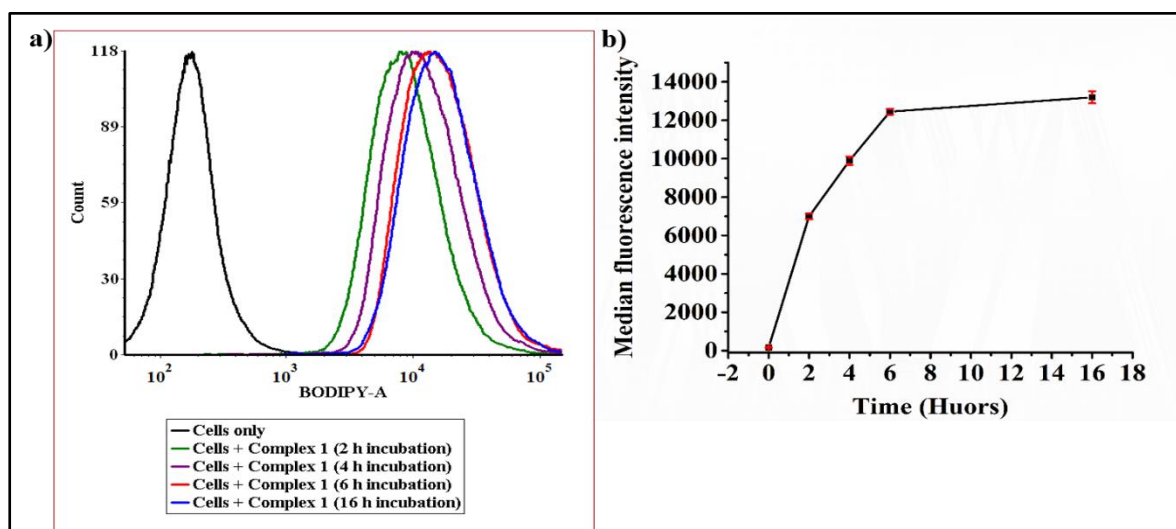

**Fig. S24** Time-dependent cellular uptake studies in HeLa cells monitored by flow cytometric analysis of complex **1**. (a) Histogram plots (normalized to peak height) and (b) median fluorescence intensity plots.

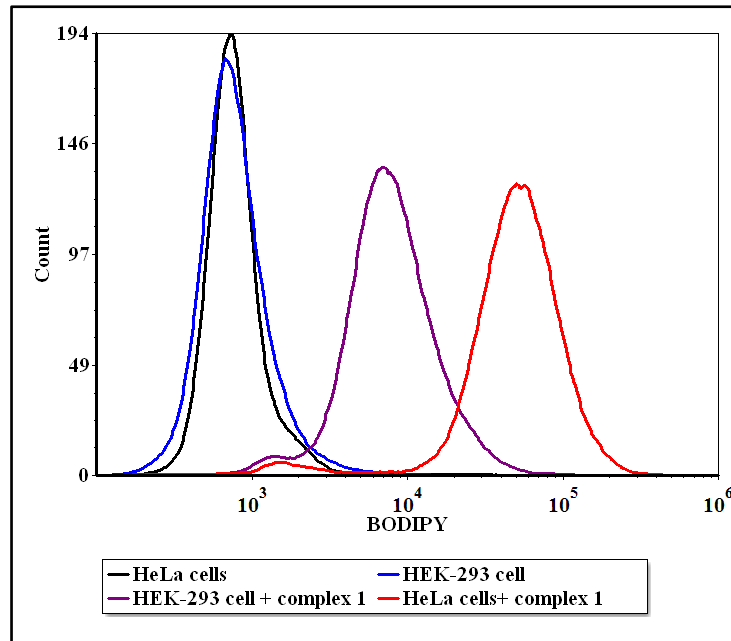

**Fig. S25** Cellular incorporation of complex **1** in different cell lines monitored by flow cytometry. Median fluorescence intensity values: HeLa cells, 646; HEK-293 cells, 632; HeLa cells+ complex **1**, 42071; HEK-293 cells+ complex **1**, 6192.

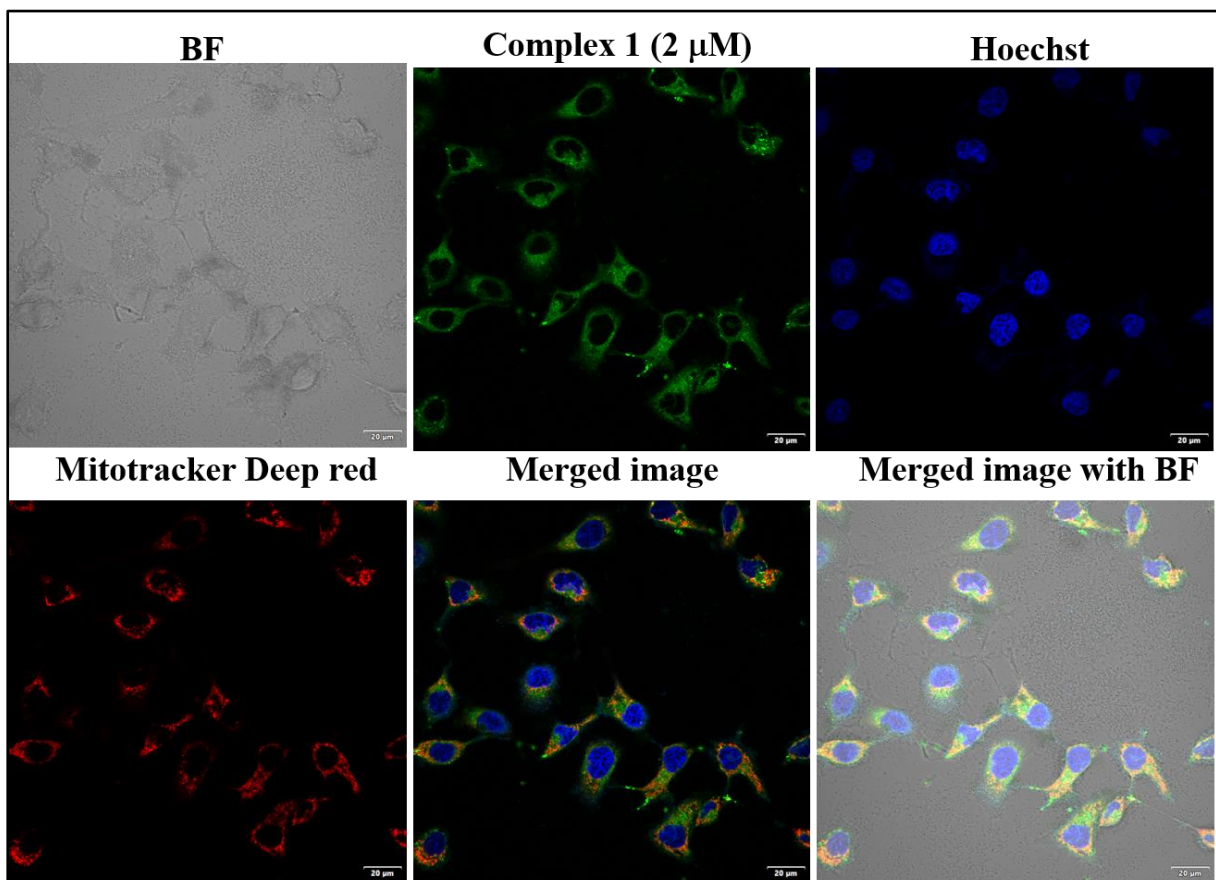

**Fig. S26** Co-localization analysis of complex **1** in HeLa cells with nuclear (Hoechst) and mitochondria (Mitotracker Deep red) staining dyes using confocal laser scanning microscopy. Scale bar = 20  $\mu\text{m}$ . BF represents brightfield image.

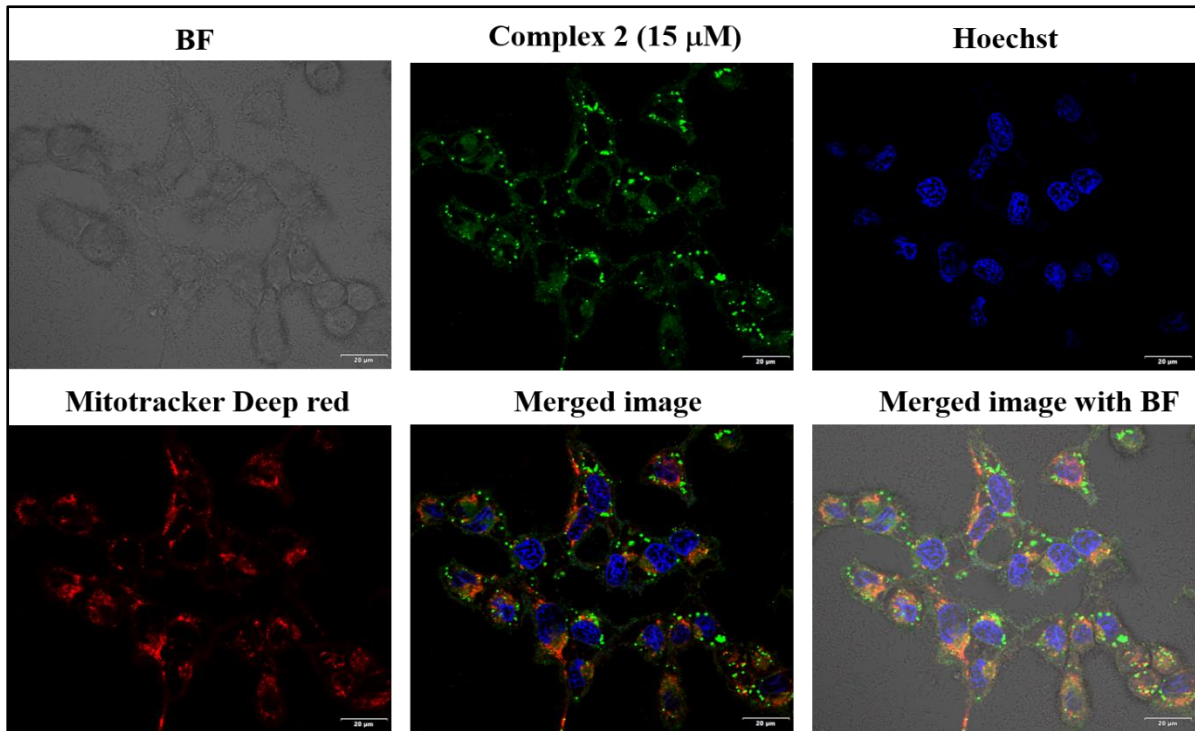

**Fig. S27** Co-localization analysis of complex 2 in HeLa cells with nuclear (Hoechst) and mitochondria (Mitotracker Deep red) staining dyes using confocal laser scanning microscopy. Scale bar = 20 μm. BF is brightfield image.

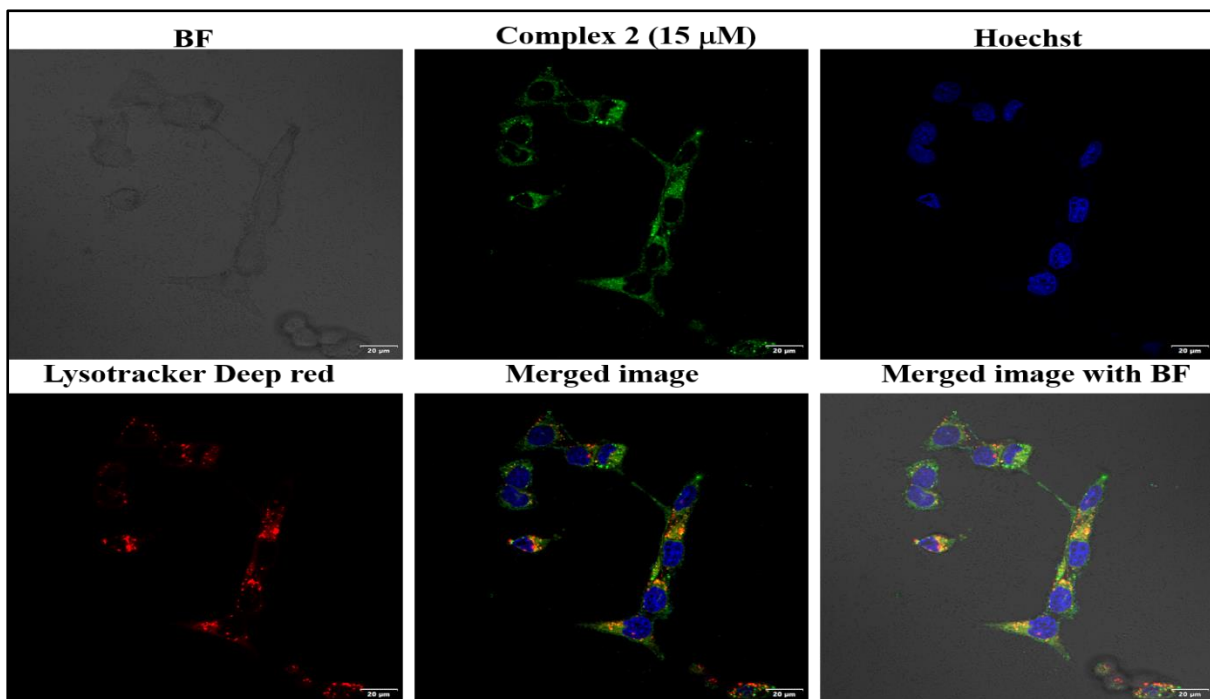

**Fig. S28** Co-localization analysis of complex 2 in HeLa cells with nuclear (Hoechst) and lysosome staining (Lysotracker Deep red) dyes using confocal laser scanning microscopy. Scale bar = 20 μm. BF means brightfield image.



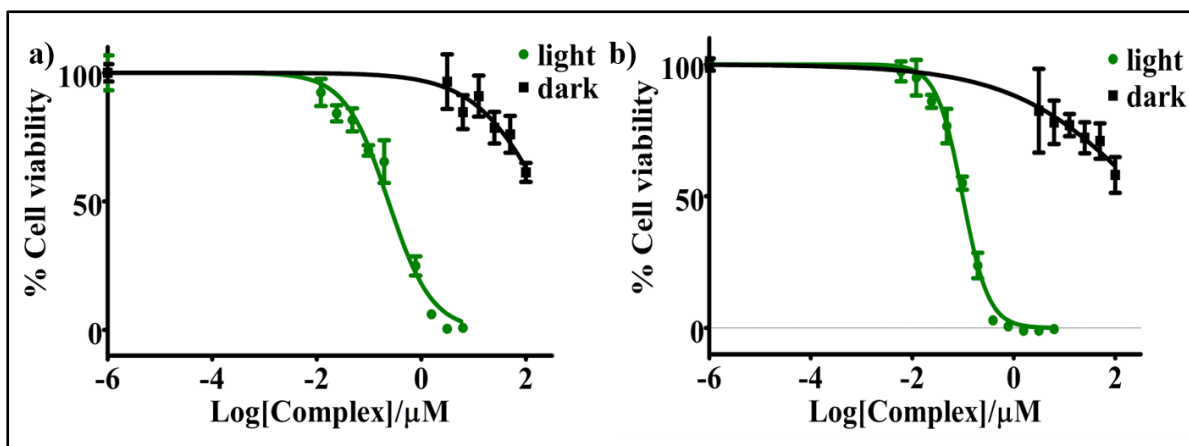

**Figure S29:** Cell viability assay plots obtained from MTT assay in HeLa cell line: a) complex 1 and b) complex 2. Light dose: 400-700 nm (5 J/cm<sup>2</sup>, 30 min exposure).

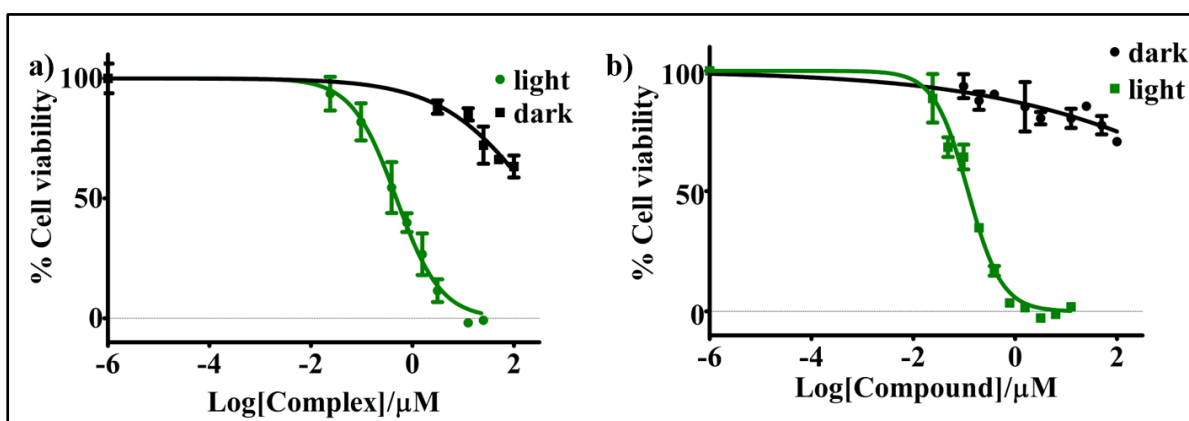

**Fig. S30** Cell viability assay plots obtained from MTT assay in H1299 cell line: a) complex 1 and b) complex 2. Light dose: 400-700 nm (5 J/cm<sup>2</sup>, 30 min exposure).

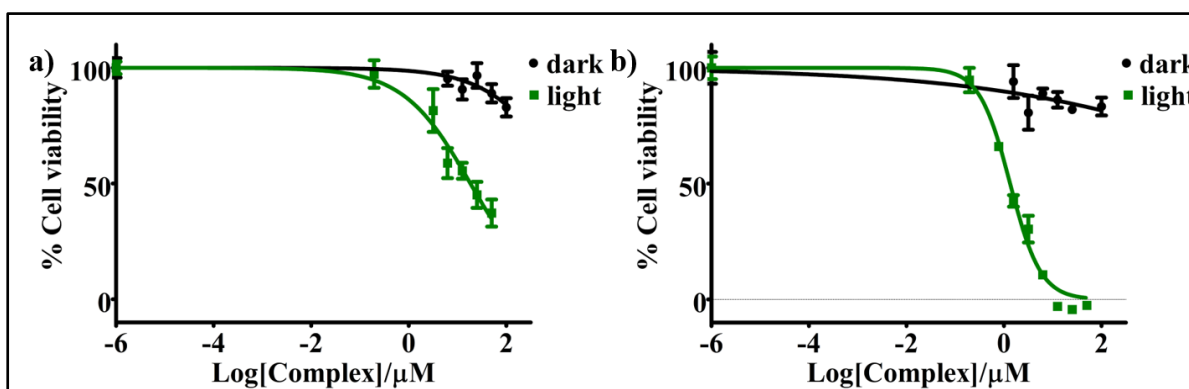

**Fig. S31** Cell viability assay plots obtained from MTT assay in HEK-293 cell line: a) complex 1 and b) complex 2. Light dose: 400-700 nm (5 J/cm<sup>2</sup>, 30 min exposure).

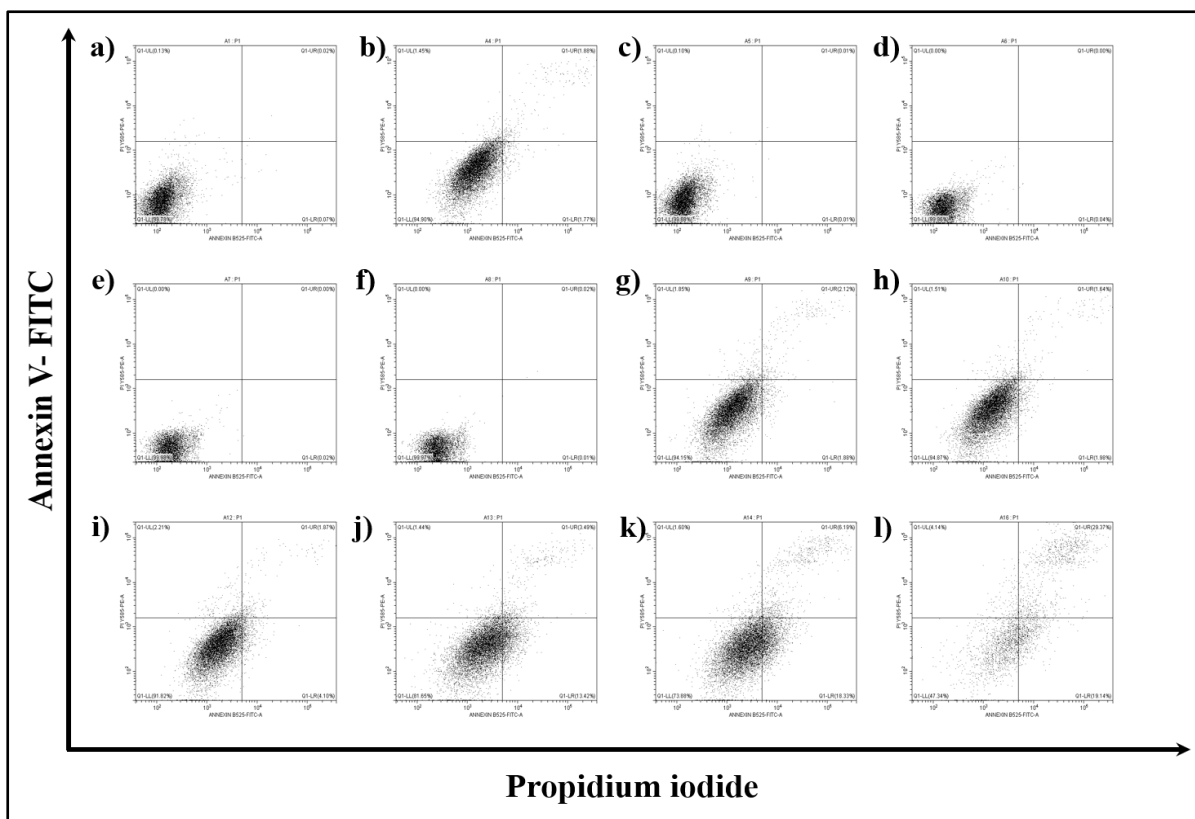

**Fig. S32** Annexin V- FITC/propidium iodide dual staining assay in HeLa cells using complex **2**. a) Cells only, b) cells with Annexin V- FITC and propidium iodide, c) cells with 0.05  $\mu\text{M}$  complex **2**, d) cells with 0.10  $\mu\text{M}$  complex **2**, e) cells with 0.20  $\mu\text{M}$  complex **2**, f) cells with 0.50  $\mu\text{M}$  complex **2**, g) cells with 0.05  $\mu\text{M}$  complex **2** and Annexin V- FITC and propidium iodide in Dark, h) cells with 0.10  $\mu\text{M}$  complex **2** and Annexin V- FITC and propidium iodide in dark, i) cells with 0.50  $\mu\text{M}$  complex **2** and Annexin V- FITC and propidium iodide in dark, j) cells with 0.05  $\mu\text{M}$  complex **2** and Annexin V- FITC and propidium iodide with light irradiation, k) cells with 0.10  $\mu\text{M}$  complex **2** and Annexin V- FITC and propidium iodide with light irradiation, l) cells with 0.50  $\mu\text{M}$  complex **2** and Annexin V- FITC and propidium iodide with light irradiation. Light irradiation was done using 400-700 nm ( $2.4 \text{ mW/cm}^2$ , 15 min) photo-reactor.

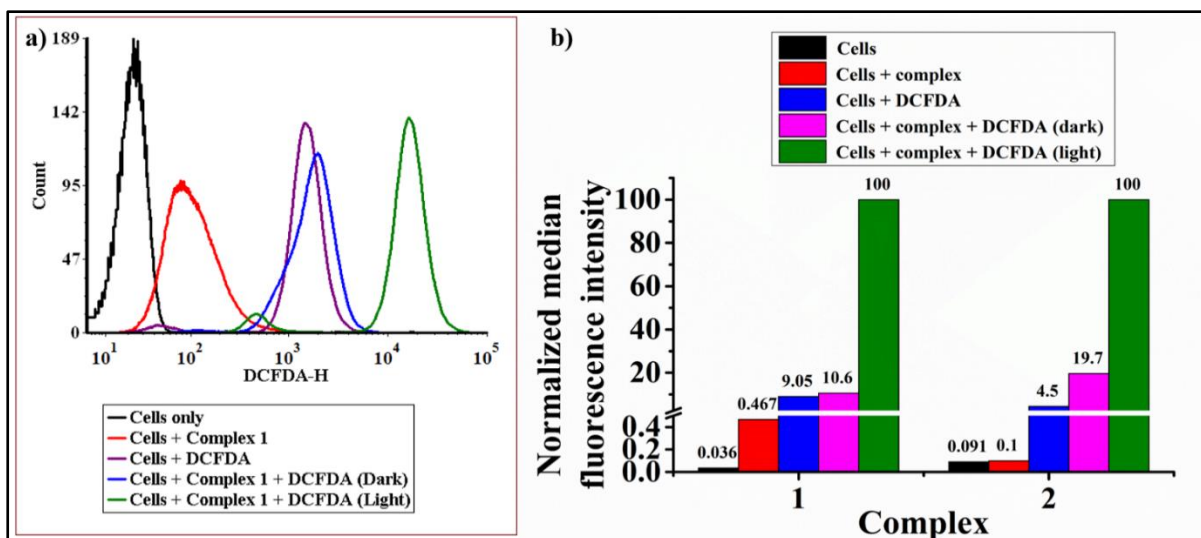

**Fig. S33** DCFDA assay in HeLa cells using 2  $\mu\text{M}$  complex **1**: a) histograms and b) bar diagrams.

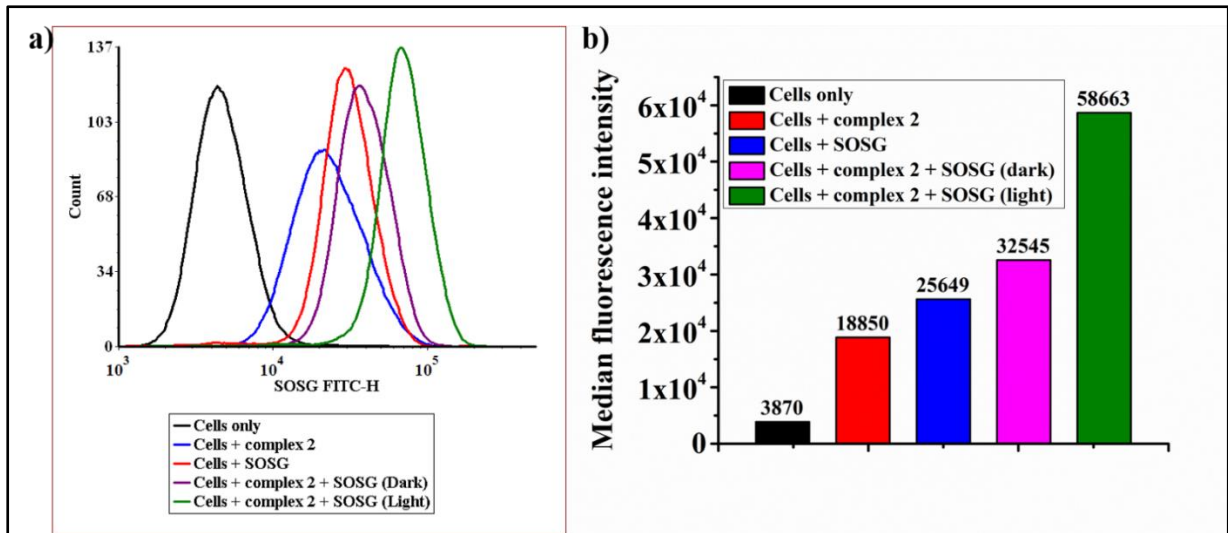

**Fig. S34** SOSG assay in HeLa cells using 2  $\mu$ M complex 2: a) histograms and b) bar diagrams.

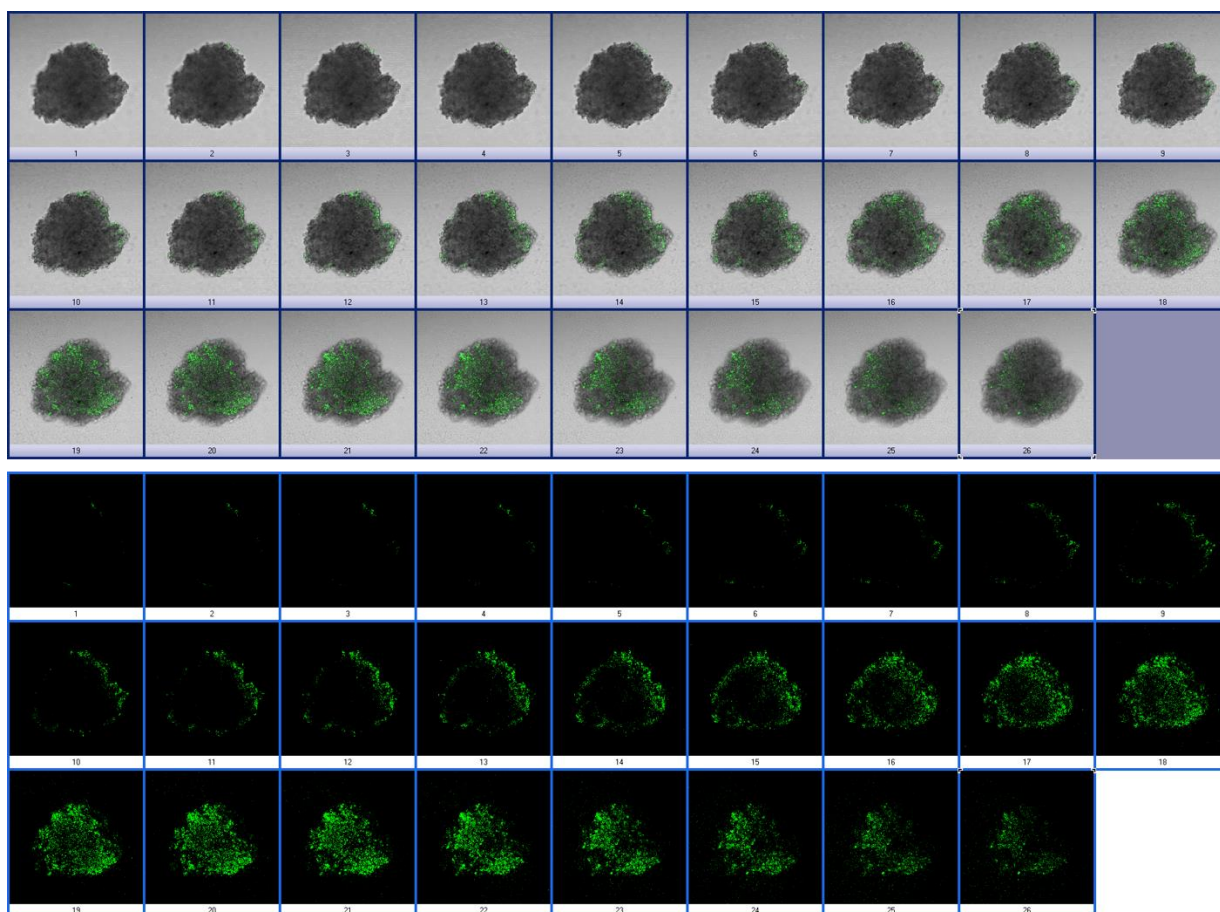

**Fig. S35** Z-stack confocal images of HeLa MCTs stained with 2 μM complex 1. Slice width 5 μm.



**Table S2.** Selected crystallographic parameters of Ligand L<sup>1</sup>

|                                                |                                                                                |
|------------------------------------------------|--------------------------------------------------------------------------------|
| Formula                                        | C <sub>44</sub> H <sub>34</sub> BCl <sub>6</sub> F <sub>2</sub> N <sub>5</sub> |
| <i>D</i> <sub>calc.</sub> / g cm <sup>-3</sup> | 1.360                                                                          |
| <i>μ</i> /mm <sup>-1</sup>                     | 0.440                                                                          |
| Formula Weight                                 | 894.27                                                                         |
| Colour                                         | clear dark orange                                                              |
| Shape                                          | block                                                                          |
| Size/mm <sup>3</sup>                           | 0.50×0.40×0.40                                                                 |
| <i>T</i> /K                                    | 296.15                                                                         |
| Crystal System                                 | triclinic                                                                      |
| Space Group                                    | <i>P</i> -1                                                                    |
| <i>a</i> /Å                                    | 11.218(7)                                                                      |
| <i>b</i> /Å                                    | 14.339(8)                                                                      |
| <i>c</i> /Å                                    | 15.150(9)                                                                      |
| <i>α</i> /°                                    | 67.92(3)                                                                       |
| <i>β</i> /°                                    | 75.53(2)                                                                       |
| <i>γ</i> /°                                    | 82.16(3)                                                                       |
| <i>V</i> /Å <sup>3</sup>                       | 2184(2)                                                                        |
| <i>Z</i>                                       | 2                                                                              |
| <i>Z</i> '                                     | 1                                                                              |
| Wavelength/Å                                   | 0.710760                                                                       |
| Radiation type                                 | MoK $\alpha$                                                                   |
| <i>θ</i> <sub>min</sub> /°                     | 2.895                                                                          |
| <i>θ</i> <sub>max</sub> /°                     | 27.740                                                                         |
| Measured Refl.                                 | 87538                                                                          |
| Independent Refl.                              | 10058                                                                          |
| Reflections with<br><i>I</i> > 2( <i>I</i> )   | 5092                                                                           |
| <i>R</i> <sub>int</sub>                        | 0.0746                                                                         |
| Goof                                           | 1.017                                                                          |
| <i>wR</i> <sub>2</sub> (all data)              | 0.3057                                                                         |
| <i>wR</i> <sub>2</sub>                         | 0.2454                                                                         |
| <i>R</i> <sub>1</sub> (all data)               | 0.1819                                                                         |
| <i>R</i> <sub>1</sub>                          | 0.0973                                                                         |

$$W = 1/[s^2 (F_o^2) + (0.1397P)^2 + 2.0037P], \text{ where } P = (F_o^2 + 2F_c^2)/3$$

**Table S3.** Selected bond length and bond angles obtained from crystal structure of **L<sup>1</sup>**

| Atom | Atom | Length/Å |
|------|------|----------|
| F1   | B1   | 1.391(5) |
| F2   | B1   | 1.380(5) |
| N4   | C31  | 1.405(4) |
| N4   | C35  | 1.340(5) |
| N4   | B1   | 1.543(5) |
| N5   | C38  | 1.338(5) |
| N5   | B1   | 1.518(5) |

  

| Atom | Atom | Atom | Angle/°  |
|------|------|------|----------|
| C31  | N4   | B1   | 124.6(3) |
| C35  | N4   | C31  | 108.2(3) |
| F1   | B1   | N4   | 109.7(3) |
| F1   | B1   | N5   | 110.6(3) |
| F2   | B1   | F1   | 109.3(3) |
| F2   | B1   | N4   | 108.9(3) |
| F2   | B1   | N5   | 110.7(3) |
| N5   | B1   | N4   | 107.6(3) |

**Table S4.** Coordinates for energy minimized structure of complex **1**

|          |     |               |              |              |
|----------|-----|---------------|--------------|--------------|
| CARBON   | 6.0 | -18.154572000 | -1.175768000 | 0.386320000  |
| NITROGEN | 7.0 | -19.568424000 | -1.200575000 | 0.394534000  |
| BORON    | 5.0 | -20.460604000 | -0.027764000 | 0.014374000  |
| NITROGEN | 7.0 | -19.581578000 | 1.151931000  | -0.373815000 |
| CARBON   | 6.0 | -18.167862000 | 1.143117000  | -0.368640000 |
| CARBON   | 6.0 | -17.466402000 | -0.012553000 | 0.008388000  |
| CARBON   | 6.0 | -20.006028000 | 2.392661000  | -0.752055000 |
| CARBON   | 6.0 | -18.876305000 | 3.205063000  | -0.994061000 |
| CARBON   | 6.0 | -17.720391000 | 2.447108000  | -0.759202000 |

|          |     |               |              |              |
|----------|-----|---------------|--------------|--------------|
| CARBON   | 6.0 | -17.691670000 | -2.474669000 | 0.776512000  |
| CARBON   | 6.0 | -18.838178000 | -3.245271000 | 1.014493000  |
| CARBON   | 6.0 | -19.977711000 | -2.446044000 | 0.773510000  |
| CARBON   | 6.0 | -15.276714000 | 0.196475000  | 1.204683000  |
| CARBON   | 6.0 | -15.981590000 | -0.004728000 | 0.006478000  |
| CARBON   | 6.0 | -15.278186000 | -0.199142000 | -1.193719000 |
| CARBON   | 6.0 | -13.880016000 | 0.207854000  | 1.204826000  |
| CARBON   | 6.0 | -13.164978000 | 0.007475000  | 0.002723000  |
| CARBON   | 6.0 | -13.881465000 | -0.198417000 | -1.197594000 |
| CARBON   | 6.0 | -16.321523000 | 2.956926000  | -0.906777000 |
| CARBON   | 6.0 | -21.442875000 | 2.763334000  | -0.863719000 |
| CARBON   | 6.0 | -21.409367000 | -2.838662000 | 0.878379000  |
| CARBON   | 6.0 | -16.286887000 | -2.968669000 | 0.921826000  |
| FLUORINE | 9.0 | -21.330717000 | 0.330275000  | 1.118949000  |
| FLUORINE | 9.0 | -21.339482000 | -0.391002000 | -1.080458000 |
| CARBON   | 6.0 | -2.180780000  | -2.651823000 | -2.544215000 |
| CARBON   | 6.0 | -1.235786000  | -3.404464000 | -3.249511000 |
| CARBON   | 6.0 | 0.128036000   | -3.176404000 | -3.023469000 |
| CARBON   | 6.0 | 0.506713000   | -2.201195000 | -2.098821000 |
| NITROGEN | 7.0 | -0.404489000  | -1.471126000 | -1.414669000 |
| CARBON   | 6.0 | -1.751189000  | -1.687984000 | -1.628101000 |
| CARBON   | 6.0 | -2.656698000  | -0.843760000 | -0.833385000 |
| NITROGEN | 7.0 | -1.995085000  | 0.018233000  | -0.009827000 |
| CARBON   | 6.0 | -2.654612000  | 0.881197000  | 0.814373000  |
| CARBON   | 6.0 | -1.747096000  | 1.723719000  | 1.608594000  |
| CARBON   | 6.0 | -2.174489000  | 2.689149000  | 2.524056000  |
| CARBON   | 6.0 | -1.227781000  | 3.440034000  | 3.228921000  |
| CARBON   | 6.0 | 0.135507000   | 3.208618000  | 3.003082000  |
| CARBON   | 6.0 | 0.511956000   | 2.231920000  | 2.079089000  |



|          |     |               |              |              |
|----------|-----|---------------|--------------|--------------|
| NITROGEN | 7.0 | -0.400900000  | 1.503541000  | 1.395337000  |
| CARBON   | 6.0 | -4.051415000  | -0.859228000 | -0.845322000 |
| CARBON   | 6.0 | -4.771078000  | 0.019927000  | -0.008057000 |
| CARBON   | 6.0 | -4.049303000  | 0.898413000  | 0.828069000  |
| CARBON   | 6.0 | -6.248036000  | 0.019965000  | -0.006480000 |
| CARBON   | 6.0 | -6.970149000  | -0.281466000 | -1.179747000 |
| CARBON   | 6.0 | -8.364433000  | -0.281076000 | -1.182073000 |
| CARBON   | 6.0 | -9.082387000  | 0.017701000  | -0.002762000 |
| CARBON   | 6.0 | -8.361833000  | 0.318137000  | 1.174531000  |
| CARBON   | 6.0 | -6.967547000  | 0.320726000  | 1.168555000  |
| CARBON   | 6.0 | -10.510565000 | 0.015348000  | -0.000728000 |
| CARBON   | 6.0 | -11.735607000 | 0.012284000  | 0.000911000  |
| CARBON   | 6.0 | 18.160521000  | -1.175406000 | -0.364364000 |
| NITROGEN | 7.0 | 19.574413000  | -1.194229000 | -0.369200000 |
| BORON    | 5.0 | 20.460942000  | -0.017267000 | 0.011388000  |
| NITROGEN | 7.0 | 19.576384000  | 1.161556000  | 0.390806000  |
| CARBON   | 6.0 | 18.162463000  | 1.146327000  | 0.382070000  |
| CARBON   | 6.0 | 17.466774000  | -0.013637000 | 0.007828000  |
| CARBON   | 6.0 | 19.993919000  | 2.405752000  | 0.765263000  |
| CARBON   | 6.0 | 18.859714000  | 3.213425000  | 1.002834000  |
| CARBON   | 6.0 | 17.708099000  | 2.449685000  | 0.767062000  |
| CARBON   | 6.0 | 17.703916000  | -2.477766000 | -0.750113000 |
| CARBON   | 6.0 | 18.854225000  | -3.244533000 | -0.982343000 |
| CARBON   | 6.0 | 19.989824000  | -2.439624000 | -0.741981000 |
| CARBON   | 6.0 | 15.279871000  | 0.178990000  | -1.195935000 |
| CARBON   | 6.0 | 15.981958000  | -0.011687000 | 0.005637000  |
| CARBON   | 6.0 | 15.275707000  | -0.200443000 | 1.205067000  |
| CARBON   | 6.0 | 13.883168000  | 0.186097000  | -1.200140000 |
| CARBON   | 6.0 | 13.165309000  | -0.007697000 | 0.001370000  |

|          |     |              |              |              |
|----------|-----|--------------|--------------|--------------|
| CARBON   | 6.0 | 13.878994000 | -0.203596000 | 1.205027000  |
| CARBON   | 6.0 | 16.306653000 | 2.953969000  | 0.909343000  |
| CARBON   | 6.0 | 21.428093000 | 2.789447000  | 0.868815000  |
| CARBON   | 6.0 | 21.423321000 | -2.826948000 | -0.841302000 |
| CARBON   | 6.0 | 16.301563000 | -2.978479000 | -0.896034000 |
| FLUORINE | 9.0 | 21.336654000 | 0.339139000  | -1.088937000 |
| FLUORINE | 9.0 | 21.334562000 | -0.375522000 | 1.112707000  |
| CARBON   | 6.0 | 2.171478000  | -2.516811000 | 2.667533000  |
| CARBON   | 6.0 | 1.224114000  | -3.223518000 | 3.415854000  |
| CARBON   | 6.0 | -0.138985000 | -2.999537000 | 3.181454000  |
| CARBON   | 6.0 | -0.514604000 | -2.075372000 | 2.204591000  |
| NITROGEN | 7.0 | 0.398894000  | -1.390180000 | 1.478374000  |
| CARBON   | 6.0 | 1.744871000  | -1.601964000 | 1.701208000  |
| CARBON   | 6.0 | 2.653177000  | -0.805942000 | 0.861326000  |
| NITROGEN | 7.0 | 1.994537000  | 0.011787000  | -0.008347000 |
| CARBON   | 6.0 | 2.657322000  | 0.826962000  | -0.877298000 |
| CARBON   | 6.0 | 1.752870000  | 1.626262000  | -1.718247000 |
| CARBON   | 6.0 | 2.183743000  | 2.539456000  | -2.684255000 |
| CARBON   | 6.0 | 1.239678000  | 3.249511000  | -3.433579000 |
| CARBON   | 6.0 | -0.124469000 | 3.030487000  | -3.200576000 |
| CARBON   | 6.0 | -0.504400000 | 2.107772000  | -2.224014000 |
| NITROGEN | 7.0 | 0.405895000  | 1.419406000  | -1.496784000 |
| CARBON   | 6.0 | 4.047760000  | -0.823806000 | 0.876300000  |
| CARBON   | 6.0 | 4.770984000  | 0.006519000  | -0.006634000 |
| CARBON   | 6.0 | 4.052000000  | 0.839525000  | -0.890531000 |
| CARBON   | 6.0 | 6.247988000  | 0.003846000  | -0.005549000 |
| CARBON   | 6.0 | 6.967766000  | -0.247175000 | 1.181037000  |
| CARBON   | 6.0 | 8.361992000  | -0.248391000 | 1.186205000  |
| CARBON   | 6.0 | 9.082771000  | -0.001114000 | -0.003265000 |

|          |     |               |              |              |
|----------|-----|---------------|--------------|--------------|
| CARBON   | 6.0 | 8.364788000   | 0.248646000  | -1.193899000 |
| CARBON   | 6.0 | 6.970550000   | 0.252317000  | -1.190982000 |
| CARBON   | 6.0 | 10.510907000  | -0.003515000 | -0.001980000 |
| CARBON   | 6.0 | 11.735959000  | -0.005497000 | -0.000610000 |
| HYDROGEN | 1.0 | -18.911292000 | 4.240191000  | -1.304550000 |
| HYDROGEN | 1.0 | -18.860784000 | -4.280175000 | 1.326835000  |
| HYDROGEN | 1.0 | -15.825198000 | 0.345751000  | 2.130984000  |
| HYDROGEN | 1.0 | -15.827840000 | -0.353244000 | -2.118537000 |
| HYDROGEN | 1.0 | -13.333816000 | 0.368242000  | 2.129163000  |
| HYDROGEN | 1.0 | -13.336354000 | -0.354172000 | -2.123367000 |
| HYDROGEN | 1.0 | -15.824133000 | 2.516667000  | -1.779272000 |
| HYDROGEN | 1.0 | -16.331175000 | 4.042691000  | -1.040511000 |
| HYDROGEN | 1.0 | -15.700544000 | 2.722065000  | -0.034722000 |
| HYDROGEN | 1.0 | -21.540861000 | 3.792885000  | -1.214128000 |
| HYDROGEN | 1.0 | -21.966347000 | 2.100161000  | -1.561140000 |
| HYDROGEN | 1.0 | -21.947243000 | 2.670869000  | 0.104710000  |
| HYDROGEN | 1.0 | -21.984134000 | -2.093805000 | 1.438402000  |
| HYDROGEN | 1.0 | -21.865488000 | -2.915720000 | -0.115547000 |
| HYDROGEN | 1.0 | -21.499238000 | -3.807427000 | 1.374545000  |
| HYDROGEN | 1.0 | -15.792671000 | -2.522497000 | 1.793132000  |
| HYDROGEN | 1.0 | -16.284202000 | -4.054421000 | 1.056027000  |
| HYDROGEN | 1.0 | -15.670282000 | -2.727334000 | 0.048431000  |
| HYDROGEN | 1.0 | -3.239332000  | -2.815880000 | -2.707879000 |
| HYDROGEN | 1.0 | -1.558579000  | -4.154447000 | -3.961596000 |
| HYDROGEN | 1.0 | 0.888551000   | -3.739062000 | -3.549876000 |
| HYDROGEN | 1.0 | 1.551534000   | -1.991966000 | -1.894131000 |
| HYDROGEN | 1.0 | -3.232677000  | 2.855819000  | 2.687461000  |
| HYDROGEN | 1.0 | -1.548849000  | 4.191258000  | 3.940478000  |
| HYDROGEN | 1.0 | 0.897328000   | 3.769816000  | 3.529159000  |

|          |     |              |              |              |
|----------|-----|--------------|--------------|--------------|
| HYDROGEN | 1.0 | 1.556309000  | 2.020075000  | 1.874703000  |
| HYDROGEN | 1.0 | -4.583671000 | -1.562690000 | -1.476236000 |
| HYDROGEN | 1.0 | -4.579881000 | 1.602312000  | 1.459913000  |
| HYDROGEN | 1.0 | -6.441558000 | -0.487959000 | -2.106245000 |
| HYDROGEN | 1.0 | -8.908625000 | -0.504352000 | -2.094321000 |
| HYDROGEN | 1.0 | -8.903980000 | 0.540428000  | 2.088235000  |
| HYDROGEN | 1.0 | -6.436870000 | 0.527987000  | 2.093689000  |
| HYDROGEN | 1.0 | 18.889112000 | 4.249318000  | 1.311326000  |
| HYDROGEN | 1.0 | 18.881846000 | -4.280634000 | -1.290294000 |
| HYDROGEN | 1.0 | 15.830565000 | 0.323655000  | -2.121664000 |
| HYDROGEN | 1.0 | 15.823155000 | -0.346663000 | 2.132476000  |
| HYDROGEN | 1.0 | 13.339132000 | 0.338608000  | -2.127086000 |
| HYDROGEN | 1.0 | 13.331708000 | -0.354532000 | 2.130316000  |
| HYDROGEN | 1.0 | 15.809198000 | 2.515746000  | 1.782805000  |
| HYDROGEN | 1.0 | 16.311355000 | 4.040400000  | 1.037876000  |
| HYDROGEN | 1.0 | 15.688654000 | 2.712304000  | 0.037020000  |
| HYDROGEN | 1.0 | 21.524283000 | 3.758414000  | 1.363421000  |
| HYDROGEN | 1.0 | 21.998449000 | 2.041815000  | 1.429620000  |
| HYDROGEN | 1.0 | 21.884141000 | 2.862327000  | -0.125460000 |
| HYDROGEN | 1.0 | 21.997554000 | -2.080011000 | -1.399056000 |
| HYDROGEN | 1.0 | 21.875759000 | -2.902422000 | 0.154434000  |
| HYDROGEN | 1.0 | 21.518655000 | -3.795471000 | -1.336943000 |
| HYDROGEN | 1.0 | 15.807396000 | -2.538841000 | -1.770658000 |
| HYDROGEN | 1.0 | 16.303819000 | -4.064900000 | -1.024718000 |
| HYDROGEN | 1.0 | 15.682000000 | -2.735360000 | -0.025222000 |
| HYDROGEN | 1.0 | 3.229594000  | -2.678027000 | 2.836953000  |
| HYDROGEN | 1.0 | 1.544498000  | -3.934986000 | 4.167455000  |
| HYDROGEN | 1.0 | -0.901300000 | -3.526989000 | 3.740689000  |
| HYDROGEN | 1.0 | -1.558780000 | -1.872121000 | 1.990719000  |

|           |      |              |              |              |
|-----------|------|--------------|--------------|--------------|
| HYDROGEN  | 1.0  | 3.242582000  | 2.696849000  | -2.852710000 |
| HYDROGEN  | 1.0  | 1.563392000  | 3.959746000  | -4.184918000 |
| HYDROGEN  | 1.0  | -0.884280000 | 3.560640000  | -3.760664000 |
| HYDROGEN  | 1.0  | -1.549466000 | 1.908194000  | -2.011120000 |
| HYDROGEN  | 1.0  | 4.576656000  | -1.492653000 | 1.546415000  |
| HYDROGEN  | 1.0  | 4.584330000  | 1.506317000  | -1.559968000 |
| HYDROGEN  | 1.0  | 6.437694000  | -0.412864000 | 2.114785000  |
| HYDROGEN  | 1.0  | 8.903962000  | -0.432718000 | 2.108412000  |
| HYDROGEN  | 1.0  | 8.908888000  | 0.431103000  | -2.115224000 |
| HYDROGEN  | 1.0  | 6.442566000  | 0.419921000  | -2.125572000 |
| RUTHENIUM | 44.0 | -0.000226000 | 0.015416000  | -0.009402000 |

**Table S5.** Coordinates for energy minimized structure of complex **2**

|          |     |               |              |              |
|----------|-----|---------------|--------------|--------------|
| CARBON   | 6.0 | -11.244673000 | 1.158944000  | -0.390497000 |
| NITROGEN | 7.0 | -12.658402000 | 1.180476000  | -0.393464000 |
| BORON    | 5.0 | -13.546625000 | 0.009059000  | 0.000841000  |
| NITROGEN | 7.0 | -12.663172000 | -1.162331000 | 0.404781000  |
| CARBON   | 6.0 | -11.249643000 | -1.149376000 | 0.396524000  |
| CARBON   | 6.0 | -10.552926000 | 0.002810000  | 0.001393000  |
| CARBON   | 6.0 | -13.083017000 | -2.397681000 | 0.804905000  |
| CARBON   | 6.0 | -11.950169000 | -3.202553000 | 1.058159000  |
| CARBON   | 6.0 | -10.797219000 | -2.445054000 | 0.808777000  |
| CARBON   | 6.0 | -10.786081000 | 2.452701000  | -0.802645000 |
| CARBON   | 6.0 | -11.935110000 | 3.217344000  | -1.046588000 |
| CARBON   | 6.0 | -13.072025000 | 2.419267000  | -0.788936000 |
| CARBON   | 6.0 | -8.363573000  | -0.233420000 | -1.191385000 |
| CARBON   | 6.0 | -9.068029000  | -0.000665000 | 0.000139000  |
| CARBON   | 6.0 | -8.361575000  | 0.229506000  | 1.191018000  |
| CARBON   | 6.0 | -6.966120000  | -0.240944000 | -1.190360000 |

|          |     |               |              |              |
|----------|-----|---------------|--------------|--------------|
| CARBON   | 6.0 | -6.247224000  | -0.004628000 | -0.001390000 |
| CARBON   | 6.0 | -6.964167000  | 0.233098000  | 1.188481000  |
| CARBON   | 6.0 | -9.396370000  | -2.946974000 | 0.965014000  |
| CARBON   | 6.0 | -14.518296000 | -2.770058000 | 0.929397000  |
| CARBON   | 6.0 | -14.504914000 | 2.806956000  | -0.894310000 |
| CARBON   | 6.0 | -9.382857000  | 2.946247000  | -0.964187000 |
| FLUORINE | 9.0 | -14.413596000 | -0.365719000 | -1.100543000 |
| FLUORINE | 9.0 | -14.427770000 | 0.382134000  | 1.089921000  |
| CARBON   | 6.0 | -2.174704000  | 2.601053000  | 2.595672000  |
| CARBON   | 6.0 | -1.228097000  | 3.334303000  | 3.319028000  |
| CARBON   | 6.0 | 0.135234000   | 3.109117000  | 3.087280000  |
| CARBON   | 6.0 | 0.511908000   | 2.156382000  | 2.138673000  |
| NITROGEN | 7.0 | -0.400841000  | 1.445217000  | 1.436974000  |
| CARBON   | 6.0 | -1.747052000  | 1.658983000  | 1.656335000  |
| CARBON   | 6.0 | -2.654180000  | 0.835686000  | 0.841963000  |
| NITROGEN | 7.0 | -1.994859000  | -0.006452000 | -0.003612000 |
| CARBON   | 6.0 | -2.655600000  | -0.848185000 | -0.848494000 |
| CARBON   | 6.0 | -1.749649000  | -1.671939000 | -1.663741000 |
| CARBON   | 6.0 | -2.178612000  | -2.613913000 | -2.602576000 |
| CARBON   | 6.0 | -1.233009000  | -3.347616000 | -3.326790000 |
| CARBON   | 6.0 | 0.130646000   | -3.123002000 | -3.096386000 |
| CARBON   | 6.0 | 0.508656000   | -2.170344000 | -2.148227000 |
| NITROGEN | 7.0 | -0.403114000  | -1.458722000 | -1.445722000 |
| CARBON   | 6.0 | -4.049148000  | 0.851406000  | 0.856364000  |
| CARBON   | 6.0 | -4.768837000  | -0.005547000 | -0.002208000 |
| CARBON   | 6.0 | -4.050636000  | -0.862995000 | -0.861521000 |
| CARBON   | 6.0 | 11.245515000  | 1.159604000  | 0.398143000  |
| NITROGEN | 7.0 | 12.659225000  | 1.178946000  | 0.404584000  |
| BORON    | 5.0 | 13.546748000  | 0.008522000  | 0.005934000  |

|          |     |              |              |              |
|----------|-----|--------------|--------------|--------------|
| NITROGEN | 7.0 | 12.662847000 | -1.164178000 | -0.394092000 |
| CARBON   | 6.0 | 11.249098000 | -1.148318000 | -0.390362000 |
| CARBON   | 6.0 | 10.553166000 | 0.004797000  | 0.003220000  |
| CARBON   | 6.0 | 13.081227000 | -2.401010000 | -0.790972000 |
| CARBON   | 6.0 | 11.947386000 | -3.203187000 | -1.049036000 |
| CARBON   | 6.0 | 10.795400000 | -2.443379000 | -0.803562000 |
| CARBON   | 6.0 | 10.787845000 | 2.453536000  | 0.810488000  |
| CARBON   | 6.0 | 11.937480000 | 3.216161000  | 1.058228000  |
| CARBON   | 6.0 | 13.073789000 | 2.416793000  | 0.802304000  |
| CARBON   | 6.0 | 8.361881000  | -0.226340000 | 1.192835000  |
| CARBON   | 6.0 | 9.068280000  | 0.002910000  | 0.001765000  |
| CARBON   | 6.0 | 8.363646000  | 0.230266000  | -1.190712000 |
| CARBON   | 6.0 | 6.964483000  | -0.233674000 | 1.189681000  |
| CARBON   | 6.0 | 6.247294000  | -0.001031000 | -0.001082000 |
| CARBON   | 6.0 | 6.966230000  | 0.233705000  | -1.190377000 |
| CARBON   | 6.0 | 9.394160000  | -2.942700000 | -0.964730000 |
| CARBON   | 6.0 | 14.515539000 | -2.783296000 | -0.896893000 |
| CARBON   | 6.0 | 14.506953000 | 2.802591000  | 0.911005000  |
| CARBON   | 6.0 | 9.385050000  | 2.949367000  | 0.968892000  |
| FLUORINE | 9.0 | 14.420609000 | -0.365184000 | 1.101561000  |
| FLUORINE | 9.0 | 14.421270000 | 0.384439000  | -1.088424000 |
| CARBON   | 6.0 | 2.175801000  | 2.581137000  | -2.623860000 |
| CARBON   | 6.0 | 1.229491000  | 3.307172000  | -3.354843000 |
| CARBON   | 6.0 | -0.133948000 | 3.082110000  | -3.123589000 |
| CARBON   | 6.0 | -0.511032000 | 2.137006000  | -2.167535000 |
| NITROGEN | 7.0 | 0.401426000  | 1.432990000  | -1.458291000 |
| CARBON   | 6.0 | 1.747738000  | 1.646289000  | -1.677528000 |
| CARBON   | 6.0 | 2.654523000  | 0.830116000  | -0.855635000 |
| NITROGEN | 7.0 | 1.994733000  | -0.006151000 | -0.004641000 |

|          |     |               |              |              |
|----------|-----|---------------|--------------|--------------|
| CARBON   | 6.0 | 2.655094000   | -0.841018000 | 0.847292000  |
| CARBON   | 6.0 | 1.748856000   | -1.658642000 | 1.668355000  |
| CARBON   | 6.0 | 2.177487000   | -2.593502000 | 2.614421000  |
| CARBON   | 6.0 | 1.231625000   | -3.321094000 | 3.344438000  |
| CARBON   | 6.0 | -0.131953000  | -3.097579000 | 3.112501000  |
| CARBON   | 6.0 | -0.509618000  | -2.152340000 | 2.156813000  |
| NITROGEN | 7.0 | 0.402407000   | -1.446782000 | 1.448550000  |
| CARBON   | 6.0 | 4.049495000   | 0.846883000  | -0.868364000 |
| CARBON   | 6.0 | 4.768879000   | -0.003045000 | -0.002536000 |
| CARBON   | 6.0 | 4.050083000   | -0.854721000 | 0.862070000  |
| HYDROGEN | 1.0 | -11.981448000 | -4.232351000 | 1.386209000  |
| HYDROGEN | 1.0 | -11.961379000 | 4.247365000  | -1.374330000 |
| HYDROGEN | 1.0 | -8.910250000  | -0.402931000 | -2.115043000 |
| HYDROGEN | 1.0 | -8.906781000  | 0.400585000  | 2.115261000  |
| HYDROGEN | 1.0 | -6.436829000  | -0.400577000 | -2.125735000 |
| HYDROGEN | 1.0 | -6.433427000  | 0.391186000  | 2.123294000  |
| HYDROGEN | 1.0 | -8.898930000  | -2.486258000 | 1.826928000  |
| HYDROGEN | 1.0 | -9.402413000  | -4.029493000 | 1.122839000  |
| HYDROGEN | 1.0 | -8.777664000  | -2.730084000 | 0.086732000  |
| HYDROGEN | 1.0 | -14.611816000 | -3.803655000 | 1.268877000  |
| HYDROGEN | 1.0 | -15.032346000 | -2.116011000 | 1.642411000  |
| HYDROGEN | 1.0 | -15.035599000 | -2.665062000 | -0.030763000 |
| HYDROGEN | 1.0 | -15.078887000 | 2.055185000  | -1.445921000 |
| HYDROGEN | 1.0 | -14.959062000 | 2.892127000  | 0.099832000  |
| HYDROGEN | 1.0 | -14.598579000 | 3.770556000  | -1.399698000 |
| HYDROGEN | 1.0 | -8.890077000  | 2.480234000  | -1.825901000 |
| HYDROGEN | 1.0 | -9.383255000  | 4.028341000  | -1.124985000 |
| HYDROGEN | 1.0 | -8.763195000  | 2.728417000  | -0.086763000 |
| HYDROGEN | 1.0 | -3.232896000  | 2.763169000  | 2.763536000  |



|          |     |              |              |              |
|----------|-----|--------------|--------------|--------------|
| HYDROGEN | 1.0 | -1.549320000 | 4.067188000  | 4.049382000  |
| HYDROGEN | 1.0 | 0.896898000  | 3.657060000  | 3.627370000  |
| HYDROGEN | 1.0 | 1.556278000  | 1.950434000  | 1.928296000  |
| HYDROGEN | 1.0 | -3.237035000 | -2.775613000 | -2.769383000 |
| HYDROGEN | 1.0 | -1.555249000 | -4.080428000 | -4.056769000 |
| HYDROGEN | 1.0 | 0.891536000  | -3.671333000 | -3.637174000 |
| HYDROGEN | 1.0 | 1.553299000  | -1.964793000 | -1.938839000 |
| HYDROGEN | 1.0 | -4.581316000 | 1.537749000  | 1.506052000  |
| HYDROGEN | 1.0 | -4.583948000 | -1.548883000 | -1.510764000 |
| HYDROGEN | 1.0 | 11.977548000 | -4.232757000 | -1.377879000 |
| HYDROGEN | 1.0 | 11.964481000 | 4.245784000  | 1.387178000  |
| HYDROGEN | 1.0 | 8.907079000  | -0.393430000 | 2.117811000  |
| HYDROGEN | 1.0 | 8.910248000  | 0.398871000  | -2.114583000 |
| HYDROGEN | 1.0 | 6.433992000  | -0.390555000 | 2.124818000  |
| HYDROGEN | 1.0 | 6.437167000  | 0.389189000  | -2.126558000 |
| HYDROGEN | 1.0 | 8.900694000  | -2.481621000 | -1.828706000 |
| HYDROGEN | 1.0 | 9.398817000  | -4.025332000 | -1.121842000 |
| HYDROGEN | 1.0 | 8.772664000  | -2.724180000 | -0.088803000 |
| HYDROGEN | 1.0 | 14.612570000 | -3.746437000 | -1.402532000 |
| HYDROGEN | 1.0 | 15.086538000 | -2.029257000 | -1.448474000 |
| HYDROGEN | 1.0 | 14.970334000 | -2.867127000 | 0.097073000  |
| HYDROGEN | 1.0 | 15.078449000 | 2.050633000  | 1.464917000  |
| HYDROGEN | 1.0 | 14.963860000 | 2.886130000  | -0.082016000 |
| HYDROGEN | 1.0 | 14.600561000 | 3.766611000  | 1.415603000  |
| HYDROGEN | 1.0 | 8.890905000  | 2.486911000  | 1.831748000  |
| HYDROGEN | 1.0 | 9.386714000  | 4.031982000  | 1.126197000  |
| HYDROGEN | 1.0 | 8.765917000  | 2.729482000  | 0.091633000  |
| HYDROGEN | 1.0 | 3.234084000  | 2.743084000  | -2.791355000 |
| HYDROGEN | 1.0 | 1.551013000  | 4.034343000  | -4.090756000 |

|           |      |              |              |              |
|-----------|------|--------------|--------------|--------------|
| HYDROGEN  | 1.0  | -0.895383000 | 3.624413000  | -3.669662000 |
| HYDROGEN  | 1.0  | -1.555485000 | 1.931538000  | -1.957102000 |
| HYDROGEN  | 1.0  | 3.235858000  | -2.754351000 | 2.782397000  |
| HYDROGEN  | 1.0  | 1.553602000  | -4.048312000 | 4.080105000  |
| HYDROGEN  | 1.0  | -0.893043000 | -3.641166000 | 3.657779000  |
| HYDROGEN  | 1.0  | -1.554186000 | -1.947974000 | 1.945880000  |
| HYDROGEN  | 1.0  | 4.581689000  | 1.528908000  | -1.522543000 |
| HYDROGEN  | 1.0  | 4.582832000  | -1.535439000 | 1.517157000  |
| RUTHENIUM | 44.0 | -0.000047000 | -0.006794000 | -0.004607000 |

**Table S6.** IC<sub>50</sub> values (μM) of some previously reported compounds<sup>S7-S11</sup>

| Compound                               | Cell line | IC <sub>50</sub> in dark | IC <sub>50</sub> in light | PI   |
|----------------------------------------|-----------|--------------------------|---------------------------|------|
| Photofrin <sup>a</sup>                 | HeLa      | 25                       | 2.57 ± 0.12               | 10   |
| Cisplatin <sup>b</sup>                 | HeLa      | 10.8 ± 0.8               | n.d                       | n.d  |
| [Ru(tpy) <sub>2</sub> ] <sup>2+b</sup> | HeLa      | >100                     | >100                      | n.d  |
| Ru1 <sup>c</sup>                       | A549      | >100                     | 0.98 ± 0.04               | >100 |
| Ru2 <sup>d</sup>                       | A549      | >53                      | 1.50                      | >35  |
| bodipy <sup>e</sup>                    | A549      | >100                     | 1.2 ± 0.09                | > 83 |
| PPIX <sup>f</sup>                      | A2780     | >100                     | 4.53 ± 0.61               | > 22 |

<sup>a</sup> 24 h drug exposure, IC<sub>50</sub> represented in μg/ml, 5 J/cm<sup>2</sup> light dose, 72 h post incubation (data taken from ref 7). <sup>b</sup> 4 h compound treatment and 44 h post incubation, Light dose 3.1 J/cm<sup>2</sup>, 480 nm, (data taken from ref 8) <sup>c</sup> 4 h compound treatment and 20 h post incubation, 10 J/cm<sup>2</sup> light dose from 400-700 nm light source, (data taken from ref 9). <sup>d</sup> 24 h compound treatment and 24 h post incubation, 0.48 J/cm<sup>2</sup> light dose from 500 nm light source, (data taken from ref 10). <sup>e</sup> 2 h compound treatment, 20 h post incubation, 2.2 J/cm<sup>2</sup> light dose from 400- 700 nm light source. <sup>f</sup> 4 h compound treatment, 44 h post incubation, 3.1 J/cm<sup>2</sup> light dose from 480 nm light source (data taken from ref 11).

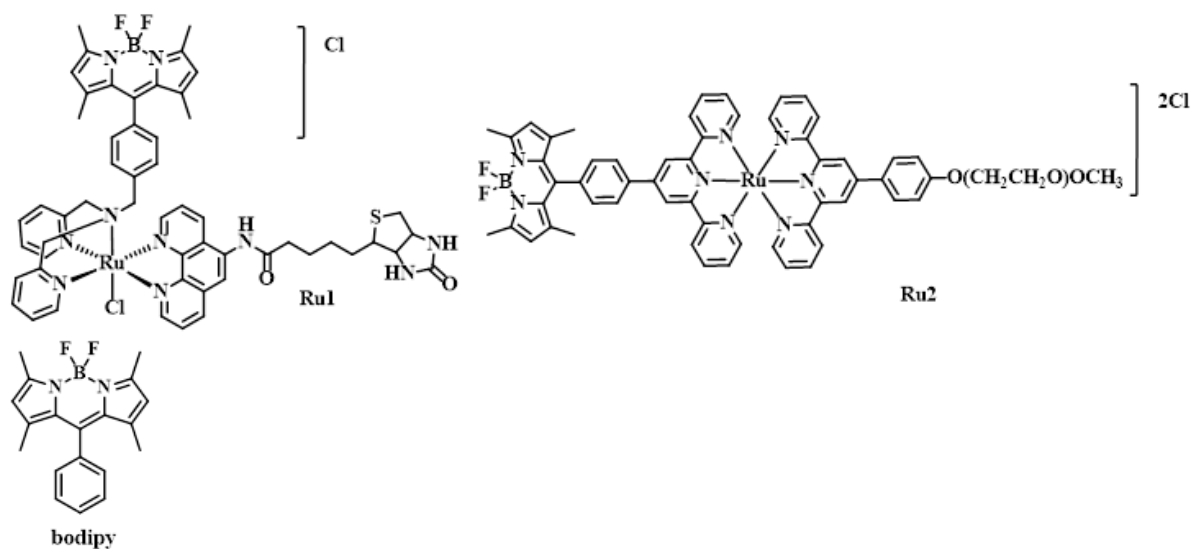

## References:

- S1. P. Evans, A. Spencer and G. Wilkinson, *J. Chem. Soc., Dalton Trans.*, 1973, 204-209.
- S2. Perrin, D. D.; Armarego, W. L. F. and Perrin, D. R. Purification of Laboratory Chemicals; Pergamon Press: 1980.
- S3. SADABS; Bruker AXS: 2012.
- S4. (a) O. V. Dolomanov, L. J. Bourhis, R. J. Gildea, J. A. K. Howard, and H. Puschmann, *J. Appl. Crystallogr.* 2009, **42**, 339–341. (b) Sheldrick, G. M. *Acta Crystallogr., Sect. C: Struct. Chem.* 2015, **C71**, 3–8.
- S5. R. P. Paitandi, S. Mukhopadhyay, R. S. Singh, V. Sharma, S. M. Mobin and D. S. Pandey, *Inorg. Chem.*, 2017, **56**, 12232–12247.
- S6. G. Ghosh, K. L. Colón, A. Fuller, T. Sainuddin, E. Bradner, J. McCain, S. M. A. Monro, H. Yin, M. W. Hetu, C. G. Cameron and S. A. McFarland, *Inorg. Chem.* 2018, **57**, 7694–7712.
- S7. E. Delaey, F. Van Laar, D. De Vos, A. Kamuhabwa, P. Jacobs and P. De Witte, *J. Photochem. Photobiol. B Biol.*, 2000, **55**, 27–36.
- S8. J. Karges, O. Blacque, M. Jakubaszek, B. Goud, P. Goldner and G. Gasser, *J. Inorg. Biochem.*, 2019, **198**, 110752.
- S9. S. Paul, P. Kundu, U. Bhattacharyya, A. Garai, R. C. Maji, P. Kondaiah and A. R. Chakravarty, *Inorg. Chem.*, 2020, **59**, 913–924.
- S10. B. Liu, Y. Gao, M. A. Javed, S. Kilina, G. Liu and W. Sun, *ACS Appl. Bio Mater.*, 2020, **3**, 6025–6038
- S11. J. Karges, M. Tharaud and G. Gasser, *J. Med. Chem.*, 2021, **64**, 4612–4622.
